1 **Immunization of mice with chimeric antigens displaying**  
2 **selected epitopes confers protection against intestinal**  
3 **colonization and renal damage caused by Shiga toxin-**  
4 **producing *Escherichia coli***

5

6

7 David A. Montero<sup>1,2</sup>, Felipe Del Canto<sup>1</sup>, Juan C. Salazar<sup>1</sup>, Sandra Cespedes<sup>1</sup>, Leandro  
8 Cádiz<sup>1</sup>, Mauricio Arenas-Salinas<sup>3</sup>, José Reyes<sup>4</sup>, Ángel Oñate<sup>4</sup>, Roberto M. Vidal<sup>1,5\*</sup>

9

10

11 1. Programa de Microbiología y Micología, Instituto de Ciencias Biomédicas, Facultad  
12 de Medicina, Universidad de Chile, Santiago, Chile

13 2. Programa Disciplinario de Inmunología, Instituto de Ciencias Biomédicas, Facultad  
14 de Medicina, Universidad de Chile, Santiago, Chile

15 3. Centro de Bioinformática y Simulación Molecular, Facultad de Ingeniería,  
16 Universidad de Talca, Talca, Chile

17 4. Departamento de Microbiología, Facultad de Ciencias Biológicas, Universidad de  
18 Concepción, Concepción, Chile

19 5. Instituto Milenio de Inmunología e Inmunoterapia, Facultad de Medicina,  
20 Universidad de Chile, Santiago, Chile

21

22

23

24

25

26

27

28

29

30

31

32

33

34 \* Corresponding author. Correspondence should be addressed to R.V. (email:  
35 rvidal@uchile.cl)

36 **Abstract**

37 Shiga toxin-producing *Escherichia coli* (STEC) cause diarrhea and dysentery, which  
38 may progress to hemolytic uremic syndrome (HUS). Vaccination has been proposed as  
39 a preventive approach against STEC infection; however, there is no vaccine for  
40 humans and those used in animals reduce but do not eliminate the intestinal  
41 colonization of STEC. The OmpT, Cah and Hes proteins are widely distributed among  
42 clinical STEC strains and are recognized by serum IgG and IgA in patients with HUS.  
43 Here, we develop a vaccine formulation based on two chimeric antigens containing  
44 epitopes of OmpT, Cah and Hes proteins against STEC strains. Intramuscular and  
45 intranasal immunization of mice with these chimeric antigens elicited systemic and  
46 local long-lasting humoral responses. However, the class of antibodies generated was  
47 dependent on the adjuvant and the route of administration. Moreover, while  
48 intramuscular immunization with the combination of the chimeric antigens conferred  
49 protection against colonization by STEC O157:H7 and the intranasal conferred  
50 protection against renal damage caused by STEC O91:H21. This pre-clinical study  
51 supports the potential use of this formulation based on recombinant chimeric proteins  
52 as a preventive strategy against STEC infections.

53

54

55 **Keywords:** Shiga toxin-producing *Escherichia coli*, STEC, chimeric antigen-based  
56 vaccine, Hemolytic uremic syndrome.

57

58

59

60

61

62

63

64

65

66

67

68

69

70

71

72

73 **Introduction**

74 Shiga toxin-producing *Escherichia coli* (STEC) are a group of food-borne pathogens  
75 causing acute and bloody diarrhea, which may progress to life-threatening  
76 complications such as hemolytic uremic syndrome (HUS).<sup>1</sup> To date there is no specific  
77 treatment for STEC infection and antibiotic use is contraindicated due to increased risk  
78 of HUS development.<sup>2</sup> However, some drugs have been specifically designed to  
79 protect against the effects of the presence of Shiga toxins and are in different stages of  
80 clinical trials.<sup>3,4</sup> While STEC O157:H7 is the serotype most frequently associated with  
81 diarrhea outbreaks and HUS cases worldwide, there are other serotypes, the incidence  
82 and impact of which on public health and the food industry have increased.<sup>5,6</sup>

83 STEC colonizes the human colon and produces Shiga toxins (Stx) that can enter the  
84 blood stream and disseminate to organs such as the kidneys and central nervous  
85 system. Once Stx reach the target organs and enter the cells, the toxins inhibit protein  
86 synthesis, leading to autophagy and apoptosis and ultimately tissue damage, which  
87 may lead to HUS.<sup>7</sup>

88 To colonize the human colon, STEC requires several virulence factors like those  
89 encoded in the locus of enterocyte effacement (LEE) pathogenicity island (PAI). LEE-  
90 mediated adherence causes the formation of the "attaching and effacing" lesion and  
91 loss of microvilli of the intestinal epithelial cells.<sup>8</sup> In addition, STEC strains lacking LEE  
92 (LEE-negative STEC) harbor other PAIs like the Locus of Adhesion and  
93 Autoaggregation (LAA), which encodes virulence factors involved in intestinal  
94 colonization.<sup>9,10</sup> In fact, the presence of two or more PAIs in single isolates of clinically  
95 relevant STEC serotypes is common, suggesting that the cumulative acquisition of  
96 mobile genetic elements encoding virulence factors may contribute additively or  
97 synergistically to pathogenicity.<sup>10,11</sup>

98 Vaccination of the infant population, which is the highest-risk group for STEC  
99 infections, and animal reservoirs have been proposed as a preventive approach that  
100 could reduce their incidence and prevalence. However, there is no approved STEC  
101 vaccine for humans, and commercial vaccines used in cattle reduce but do not  
102 eliminate colonization and shedding of these bacteria.<sup>12</sup> Therefore, the development of  
103 an effective STEC vaccine is still underway. STEC proteins involved in attachment to  
104 host tissues are eligible targets for vaccine development, as they determine initial steps  
105 during infection; however, the selection of antigens that may provide a broadly and  
106 protective immune response among their diverse adhesion and colonization  
107 mechanisms is a pivotal point to consider.<sup>13</sup> An additional difficulty for the development

108 of an effective STEC vaccine has been the lack of an animal model of infection that can  
109 reproduce the pathologies caused in humans.<sup>14</sup> Despite these limitations, several  
110 STEC vaccine candidates have been evaluated in laboratory animals (mice, rats and  
111 rabbits) and in cattle, with promising results. They include Stx subunit-based  
112 vaccines,<sup>15–17</sup> protein and peptide-based vaccines,<sup>17–21</sup> attenuated bacteria-based  
113 vaccines,<sup>22</sup> bacterial ghost-based vaccines,<sup>23</sup> DNA-based vaccines,<sup>24,25</sup> and more  
114 recently nanoparticle-based vaccines.<sup>26</sup> While most of these vaccine candidates are  
115 based on LEE-encoded antigens and Stx subunits, there are several antigens encoded  
116 outside LEE that are expressed *in vivo* during human infection that could be suitable  
117 targets for vaccine development.<sup>13,27</sup>

118 For instance, Outer membrane protease I (OmpT) and Calcium binding antigen 43  
119 homologue (Cah) proteins have been shown to be recognized by IgG and IgA  
120 antibodies present in sera from patients who develop HUS (hereinafter referred to as  
121 HUS sera). Notably, the *ompT* gene has been identified in almost all clinical STEC  
122 strains and, in the case of the *cah* gene, its detection frequency is higher than 70%.<sup>13</sup>  
123 Another promising antigen is the Hemagglutinin from STEC (Hes), which is recognized  
124 by IgG present in HUS sera.<sup>13</sup> In addition, the *hes* gene, which is carried by the LAA  
125 PAI, is identified in about 40% and 46% of LEE-negative STEC strains isolated from  
126 humans and cattle, respectively.<sup>9,10,28</sup> Thus, these three antigens are widespread  
127 among clinical STEC strains, but it is also important to note that they are mostly absent  
128 in commensal *E. coli* strains,<sup>9,10,13</sup> which could diminish the probability of cross-  
129 reactivity with commensal microbiota. Nevertheless, the production and purification of  
130 outer membrane proteins (OMPs) such as OmpT, Cah and Hes poses a challenge due  
131 to their partially hydrophobic surfaces, flexibility and lack of stability that affect their  
132 solubility and efficient purification. In addition, strong detergents are used in the  
133 purification of this class of proteins and therefore the loss of conformational epitopes  
134 may impair their antigenicity and efficiency as immunogens.<sup>29</sup>

135 To circumvent these issues and to develop a STEC vaccine targeting the OmpT, Cah  
136 and Hes proteins, we implemented a vaccine development approach based on the  
137 identification of linear B-cell epitopes for the design of chimeric antigens that include  
138 them. Here we demonstrate that the immunization of mice with chimeric antigens  
139 displaying selected epitopes of OmpT, Cah and Hes proteins induces immune  
140 responses that reduce intestinal colonization and prevent renal damage caused by  
141 STEC. Overall, this study revealed the feasibility of using such type of formulation  
142 based on recombinant chimeric proteins against STEC colonization and more  
143 relevantly to protect against kidney damage by Shiga toxin-producing *Escherichia coli*.

144 We anticipate that our comprehensive experimental approach will contribute to the  
145 development and evaluation of future chimeric antigen-based vaccines, and while our  
146 candidate was initially intended to protect humans against colonization/infection by  
147 STEC, we believe that it could also have an effect on STEC elimination in the animal  
148 reservoir (bovine and pig) and realistically such a trial is most likely to be conducted  
149 first.

150

## 151 **Results**

152 **The OmpT, Cah and Hes proteins have several linear B-cell epitopes that are**  
153 **recognized by IgG and IgA from HUS sera but not from control sera.**

154

155 An overview of our vaccine development approach is shown in Figure 1. We carried out  
156 a high-throughput screening of linear B-cell epitopes in the OmpT, Cah and Hes  
157 proteins by using a peptide microarray assay (see Methods). A total of 6, 6 and 5  
158 epitope-like spot patterns were identified in the peptide slides of OmpT, Cah and Hes  
159 proteins (**Fig. 2a-2c**), respectively. As a complementary approach, we used a number  
160 of immunoinformatics tools and found that 13 out of 17 of the experimentally identified  
161 B-cell epitopes were predicted *in silico* by one or more algorithms (**Table 1**). This result  
162 highlights the advances in the accuracy of these bioinformatics tools. On the other  
163 hand, it is known that MHC class II (MHC-II) epitopes included in peptide vaccines  
164 enhance T-cell-dependent antibody responses<sup>30</sup>. Thus, we also performed an *in silico*  
165 analysis for the prediction of MHC-II binding peptides and found two putative T-cell  
166 epitopes in the OmpT and Cah proteins (**Table 2**).

167

168 Because the peptide microarray assay was performed with a mix of three HUS sera,  
169 we sought to confirm the reactivity of these epitopes using a larger number of sera. We  
170 also tested the reactivity of the epitopes against three sera obtained from children with  
171 no medical record of STEC-related disease (hereinafter referred to as control sera). For  
172 this, short peptides ranging from 15 to 24 amino acids (aa) which include each epitope  
173 were chemically synthesized, and their reactivity to IgG and IgA was assessed by  
174 ELISA. In general, the peptides were recognized at higher levels by IgG than by IgA  
175 from HUS sera (**Fig. 2d-i**). Furthermore, the peptides derived from the same antigen  
176 were recognized by similar levels of IgG or IgA, with the exception of Cah\_5 and  
177 Hes\_5, which showed a higher level of reactivity to IgG compared to Cah\_4 and  
178 Hes\_4, respectively (**Fig. 2f and 2h**). The frequency of reactivity of the peptides to IgG

179 ranged from 60% (Hes\_4) to 100% (Cah\_5, Cah\_6 and Hes\_5), while for IgA it was  
180 between 29% (Cah\_2) and 100% (Hes\_5) (**Table 1**). As expected, a polyclonal  
181 antibody response was observed within individuals, evidenced by the variable  
182 concentration of IgG and IgA antibodies that recognize each tested peptide (**Fig. 2j-k**).  
183 Importantly, none of the peptides was recognized by IgG or IgA from control sera  
184 (**Table 1, Fig. 2j-k**). Taken together, these results indicate that the identified linear B-  
185 cell epitopes are broadly recognized and immunodominant during immune responses  
186 against STEC.

187

188 **Chimeric proteins displaying linear B-cell epitopes of OmpT, Cah and Hes**  
189 **proteins are recognized by IgG and IgA from HUS sera but not from control sera.**

190

191 We consider that the best epitopes for vaccine development are those that are  
192 conserved, broadly distributed among clinical isolates, with higher levels of  
193 immunoreactivity and surface exposition in the native antigen. As a result, the Hes\_4  
194 (lower reactivity and detection frequency) and OmpT\_5 (limited surface exposition)  
195 epitopes were discarded and not used in further assays. For the *in silico* design of  
196 proteins we implemented two different approaches. Firstly, we noticed that the linear B-  
197 cell epitopes of OmpT and Hes are overlapped or consecutively arranged along the  
198 protein (**Fig. 2a and 2c**), suggesting that they form antigenic domains (AD). We took  
199 advantage of this and designed a chimeric protein containing these AD through the  
200 fusion of 135 AA and 127 AA from OmpT and Hes proteins, respectively (**Fig. 3a**). We  
201 named this protein Chimera 1 (Chi1; 262 AA and 29 kDa), which includes a total of  
202 eight B-cell epitopes (OmpT\_1, OmpT\_2, OmpT\_3, OmpT\_4, Hes\_1, Hes\_2, Hes\_3  
203 and Hes\_5) and two predicted T-cell epitopes (**Table 2**). In the second approach, we  
204 used the passenger domain of Cah ( $\alpha$ Cah) as a carrier (keeping its epitopes) and  
205 incorporated several B-cell epitopes of OmpT and Hes (**Table 2, Fig. 3d**). Thus, this  
206 second protein named Chimera 2 (Chi2; 559 AA and 56 kDa) includes a total of eleven  
207 B-cell epitopes (OmpT\_1, OmpT\_6, Hes\_1, Hes\_2 and Hes\_5, Cah\_1, Cah\_2, Cah\_3,  
208 Cah\_4, Cah\_5, Cah\_6) and two predicted T-cell epitopes (**Table 2**).

209

210 We predicted the 3D structures for both chimeric proteins, which were refined and  
211 validated (see Methods) (**Fig. 3a and 3d**). A Ramachandran plot analysis revealed that  
212 94.6% and 86.6% of amino acid residues from the Chi1 and Chi2 modeled structures  
213 were in favored regions, respectively (**Fig. 3b and 3e**). In addition, the Z-score of the  
214 Chi1 and Chi2 modeled structures were -2.52 and -7.01 respectively, which are within  
215 the range of scores found for native proteins of similar size (**Fig. 3c and 3f**). The

216 predicted solubility, *in vivo* half-life and instability index of both chimeric proteins  
217 suggested that their expression and purification could be feasible (**Table 2**). Consistent  
218 with the above, the production of these recombinant proteins in *E. coli* showed that  
219 they are stable, water-soluble and have the predicted molecular weight (**Fig. 3g**).  
220 Further, we confirm that both the Chi1 and Chi2 proteins are recognized by IgG and  
221 IgA of HUS sera (**Fig. 3h and 3i**). We also found that the reactivity of Chi2 to IgG of  
222 HUS sera was significantly higher than  $\alpha$ Cah (**Fig. 3h**), indicating that the incorporation  
223 of B-cell epitopes of OmpT and Hes increased the seroreactivity. However, this  
224 difference was not observed in the reactivity to IgA of HUS sera (**Fig. 3i**). Importantly,  
225 none of the proteins was seroreactive to IgG and IgA of control sera (not shown).

226

### 227 **Chi1 and Chi2 antigens, administered alone or in combination, trigger long-** 228 **lasting systemic and local humoral responses in mice.**

229

230 Having established that the Chi1 and Chi2 proteins are seroreactive to HUS sera, we  
231 sought to evaluate them as immunogens. For this, BALB/c mice were immunized  
232 following the scheme described in Figure 1d. Immunity achieved by vaccination is  
233 influenced to a large extent by the administration route and the type of adjuvant<sup>31-33</sup>.  
234 Therefore, we also compared systemic and local immune responses triggered by the  
235 chimeric antigens when administered with Imject Alum or Sigma adjuvants by  
236 intramuscular or intranasal route, respectively.

237

238 The measurement of Chi1 and Chi2-specific IgG antibodies in serum showed that mice  
239 immunized with Chi2 or Chi1 plus Chi2 by either intramuscular or intranasal route  
240 elicited significantly higher levels of IgG on days 28 and 42 than the PBS control group  
241 (**Fig. 4a**). In general, intramuscular immunization induced higher levels of specific IgG  
242 antibodies than the intranasal route, this difference being significant in mice immunized  
243 with Chi1 plus Chi2. Similarly, specific IgA antibodies in serum were significantly higher  
244 in mice immunized with Chi2 or Chi1 plus Chi2 by both administration routes on days  
245 14, 28 and 42 than in the PBS control group (**Fig. 4b**). It was also observed that  
246 intramuscular immunization with Chi1 plus Chi2 induced higher levels of specific IgA  
247 antibodies than the intranasal route, this difference being significant on day 42. In  
248 contrast, there were no differences on the levels of specific IgG and IgA antibodies in  
249 serum between mice immunized with Chi1 and the PBS control group (**Fig. 4a-b**).  
250 Regarding specific IgM antibodies in serum, all vaccine formulations and administration  
251 routes induced significant higher antibody levels on days 14, 28 and 42 than the PBS  
252 control group (**Fig. 4c**).

253 To evaluate the induction of mucosal responses, specific secretory IgA (sIgA)  
254 antibodies were determined in feces. Mice immunized with Chi1 and Chi1 plus Chi2 by  
255 intranasal route elicited significantly higher levels of specific sIgA on days 14 and 28  
256 than the PBS control group (**Fig. 4d**). However, the sIgA levels for both experimental  
257 groups were similar on day 42 compared to the PBS control group. On day 42, only  
258 mice immunized with Chi2 by intranasal route elicited significantly higher levels of  
259 specific sIgA than the PBS control group. Taken together, these results indicate that  
260 immunization with Chi1, Chi2 or Chi1 plus Chi2 induces a systemic and local humoral  
261 response influenced by the type of adjuvant and the administration route as long as 42  
262 days after the third immunization.

263

#### 264 **Chi1 and Chi2 antigens administered in combination by intramuscular route** 265 **reduce intestinal colonization and fecal shedding of STEC O157:H7**

266

267 We next evaluated whether immune responses elicited by vaccination with the chimeric  
268 antigens may confer protection against intestinal colonization by STEC. For this, two  
269 weeks after the last booster immunization, mice were treated with streptomycin and  
270 then orally challenged with STEC O157:H7 str. 86-24 (**Fig. 1d**; see Methods). Notably,  
271 mice immunized with Chi1 plus Chi2 by intramuscular route showed a significantly  
272 lower fecal shedding of the STEC 86-24 strain from day 8 post-infection to the end of  
273 the experiment (day 12) compared to the PBS control group (**Fig. 5a**). In mice  
274 immunized by the intranasal route, only the Chi2 group showed a slight but significant  
275 decrease in fecal shedding of STEC 86-24 strain on days 7 and 8 compared to the  
276 PBS control group. However, on day 9 and later, this difference was not observed (**Fig.**  
277 **5b**).

278 On day 12 post-infection, mice were euthanized and the level of colonization of the  
279 challenge strain in the cecum was determined. Consistent with the above results,  
280 recovery of the STEC 86-24 strain was significantly lower in mice immunized with Chi1  
281 plus Chi2 by intramuscular route than in the PBS control group, which corresponded to  
282 2.1 log of protection (**Table 3**). The other experimental groups presented levels of  
283 colonization similar to the PBS control group. These data demonstrate that  
284 immunization of mice with Chi1 plus Chi2 by intramuscular route induces protective  
285 immune responses against intestinal colonization of STEC O157:H7 in this model.

286

#### 287 **Chi1 and Chi2 antigens administered alone or in combination by intranasal route** 288 **avoid renal damage caused by STEC O91:H21**



289 Kidney damage is one of the most severe clinical outcomes that can occur during  
290 STEC infection due to the action of Shiga toxins. In streptomycin-treated mice, Stx2d-  
291 producing *E. coli* strains have been shown to affect renal function leading to death.<sup>34,35</sup>  
292 For instance, in a previous study we showed that the Stx2d-producing *E. coli* O91:H21  
293 str. V07-4-4 is lethal to mice when they are orally inoculated with a dose of  $10^9$  CFU.<sup>10</sup>  
294 However, with a dose lower than  $10^5$  CFU of the STEC V07-4-4 strain, mice develop  
295 renal pathologies but survive for at least 12 days (unpublished results). Therefore, we  
296 conducted further work to investigate whether immunization with the chimeric antigens  
297 confers protection against renal damage caused by the STEC V07-4-4 strain. For this,  
298 two weeks after the last booster immunization, mice were treated with streptomycin  
299 and orally challenged with  $10^5$  CFU of the STEC V07-4-4 strain. Our results showed  
300 that on days 7 and 12 post-infection, mice intranasally immunized with Chi1, Chi2 or  
301 Chi1 plus Chi2 had creatinine levels in urine similar to uninfected mice (**Fig. 5c and**  
302 **5d**). This was particularly evident in mice immunized with Chi1 plus Chi2. In contrast,  
303 mice immunized by intramuscular route and the PBS control group showed significantly  
304 higher levels of creatinine in urine than uninfected mice. Moreover, the  
305 histopathological analysis of kidney tissue obtained on day 12 post-infection showed  
306 that mice immunized by intranasal route had mild or no evident tissue injuries (**Fig 5e**).  
307 Conversely, mice immunized by intramuscular route and the PBS control group  
308 showed moderate and severe tissue injuries, respectively (**Fig 5e**). Urinary clinical  
309 markers such as the number of leukocytes and urobilinogen levels on day 12 post-  
310 infection also evidenced the protection achieved by intranasal immunizations (**Table 4**).  
311 Together, these results indicate that immunization with the chimeric antigens by  
312 intranasal route protects against kidney damage caused by the STEC V07-4-4 strain.

313

## 314 **Discussion**

315 Sera obtained from Chilean-hospitalized pediatric patients diagnosed with HUS, after  
316 STEC primoinfection, recognizes antigens such as OmpT, Cah and Hes, as result of a  
317 primary immune response to an initial STEC antigen exposure with the development of  
318 immunological memory (sera obtained from the convalescent phase with IgG and IgA  
319 that recognize STEC antigens).<sup>13</sup> Therefore, the key to designing a new vaccine also  
320 considers the bacterial target selected for this process. Since STEC infection  
321 recurrence is an uncommon process,<sup>36,37</sup> it is likely that STEC primoinfection can  
322 trigger a successful immune memory directed against key bacterial antigens and that  
323 remains over time.

324 Here we demonstrated that immunization of mice with chimeric antigens displaying  
325 selected epitopes of OMPs confers protection against intestinal colonization and renal  
326 damage caused by STEC. It is well established that a suitable vaccine must be  
327 composed of different antigens to boost the immune response with a wide range of  
328 protection. Interestingly, the antigens selected for our vaccine design are different from  
329 those used in most trials;<sup>62-65</sup> however, they are widely distributed in STEC and  
330 involved in several of its pathogenicity mechanisms.<sup>10,13</sup> While Cah and Hes are related  
331 to the bacterial-host interaction,<sup>9,66</sup> OmpT participates in the biogenesis of bacterial  
332 outer membrane vesicles (OMVs)<sup>58</sup> and the degradation of antimicrobial peptides like  
333 LL-37.<sup>61,67</sup> To our knowledge, this is the first formulation based on recombinant  
334 chimeric proteins that includes a virulence factor exclusive of LEE-negative STEC  
335 strains in a vaccine design.

336 In general, subunit and protein-based vaccines have proven to be safe and to have a  
337 defined and homogeneous composition between production batches. This latter aspect  
338 is an important advantage over other types of vaccines, which may present complex  
339 manufacturing processes, with subsequent regulatory and safety issues.<sup>38-40</sup> In Gram-  
340 negative bacteria, OMPs are primary components interacting with host cells; therefore,  
341 vaccines targeting these proteins may be effective by blocking key pathogenic  
342 mechanisms.<sup>13,41</sup> However, as previously mentioned, the purification and efficient  
343 production of OMPs pose a major challenge. Thus, construction of water-soluble and  
344 stable chimeric antigens displaying epitopes from OMPs is an approach worth  
345 exploring.

346 Our vaccine development approach takes advantage of immunoinformatics tools and *in*  
347 *vitro* assays (epitope mapping, ELISA) to predict and identify linear B-cell epitopes,  
348 respectively (**Fig. 1**). Previous studies have also demonstrated the usefulness of  
349 immunoinformatics tools for the development of vaccine candidates against STEC and  
350 other pathogens.<sup>24,42</sup> Both, *in silico* and *in vitro* assays, allowed us to select the best  
351 epitopes (**Fig. 2, Table 1, Table 2**).

352 Importantly, our results provide proof-in-principle that incorporating selected linear B-  
353 cell epitopes into a carrier protein, such as  $\alpha$ Cah, may result in an increase in  
354 antigenicity (**Fig. 3h**). Many autotransporter (AT) proteins and especially their  
355 passenger domains are potential vaccine targets.<sup>43,44</sup> In fact, the pertactin AT from  
356 *Bordetella pertussis* is a component of licensed pertussis vaccines.<sup>45</sup> Thus, other  
357 passenger domains from AT proteins could be used as carriers to design chimeric  
358 antigens.

359 The immunization studies showed that the Chi1 and Chi2 antigens, administered alone  
360 or in combination, induce humoral responses which remain active until day 42  
361 postimmunization (**Fig 4**). However, the class of antibodies generated was in general  
362 dependent on the adjuvant and the administration route. This dependency was most  
363 obvious in mice immunized with Chi1 plus Chi2, which elicited significantly higher  
364 levels of specific IgG and IgA antibodies in serum when intramuscularly immunized  
365 than when intranasally immunized (**Fig. 4a-b**). Further, the sIgA detection in feces after  
366 systemic immunization is interesting; however, while this seems to be a controversial  
367 issue, there is literature describing this type of results suggesting that vaccines  
368 systemically administered can trigger mucosal immune responses.<sup>46</sup> Many questions  
369 await an answer, and one of them is how the immune response moves to the mucosa  
370 after systemic immunization, which for some researchers, in addition to producing a  
371 paradigm shift, may also mean a modification in vaccine design and delivery.<sup>47</sup>

372 Secretory IgA is the most abundant immunoglobulin of the mammalian mucosa, playing  
373 a fundamental role in the immunity of the gastrointestinal tract.<sup>48</sup> Therefore, the  
374 development of vaccines against intestinal pathogens has traditionally given priority to  
375 immunogens that induce significant levels of sIgA. However, since some  
376 gastrointestinal infections can be eliminated in the absence of sIgA; other classes of  
377 antibodies such as IgM and IgG may also play an important role in the intestinal  
378 immunity.<sup>49</sup> Unfortunately, the presence and effector functions of IgG in the intestinal  
379 mucosa have been largely ignored in the literature.<sup>50</sup> A recent study by Kamada et al.,  
380 2015,<sup>51</sup> revealed that IgG in the murine intestine leads to the selective elimination of a  
381 virulent *Citrobacter rodentium* subpopulation by luminal neutrophils. The protective role  
382 of IgG against other enteropathogens such as rotavirus has also been demonstrated.<sup>52</sup>

383 Our challenge experiments using the STEC O157:H7 strain showed that only  
384 immunization with Chi1 plus Chi2 by intramuscular route confers protection against  
385 intestinal colonization (**Fig. 5a-b, Table 3**). In the murine model of infection, the  
386 permanent addition of streptomycin throughout the challenge, promotes STEC  
387 O157:H7 colonization by preventing the interference of the microbiota. This situation  
388 might explain the decrease in the final part of the protection test (days 8-12), only  
389 associated to immune response against STEC O157:H7. Probably, if we had removed  
390 the treatment with streptomycin, the interfering activity of the microbiota added to the  
391 immune response would have affected early colonization by STEC O157:H7 (before 8  
392 days).<sup>53</sup> Since intramuscular immunization with Chi1 plus Chi2 did not lead to  
393 significant production of specific fecal sIgA antibodies (**Fig. 4d**), it is possible to  
394 correlate the protection achieved with other classes of immunoglobulins and more likely

395 with the IgG. On the other hand, although Chi2 includes epitopes of the other two  
396 antigens in addition to Cah, it was observed that the set of intranasally immunized  
397 mice, yielded a mild immune response against O157:H7 on days 7 and 8, but this was  
398 neither sufficiently protective nor maintained over time. Other vaccine candidates that  
399 generated significant levels of specific IgG antibodies in serum but not fecal sIgA  
400 antibodies have also conferred protection to mice against colonization by STEC  
401 O157:H7.<sup>54</sup> Consequently, our results and those reported by others support the idea of  
402 a pivotal role of the IgG antibodies in the defense against enteropathogens. This is a  
403 major finding that will be relevant to the development of vaccines against these  
404 pathogens by avoiding biases in the selection of the "best" immunogens based mainly  
405 on the ability to induce sIgA antibody responses.

406 Because the challenge studies were performed only to day 12 post-inoculation, it was  
407 not possible to determine whether the immune responses triggered by the  
408 intramuscular immunization with Chi1 and Chi2 may lead to complete clearance of  
409 STEC O157:H7. Long-term protection experiments in mice and other animal models  
410 immunized will complement the evaluation of this formulation based on recombinant  
411 chimeric proteins.

412 An effective STEC vaccine may also confer protection against the action of the Stx.  
413 STEC export the Shiga toxins along with a number of OMPs and cytoplasmic proteins  
414 via outer membrane vesicles (OMVs).<sup>55-57</sup> These OMVs may be endocytosed in a  
415 dynamin-dependent manner by intestinal epithelial cells, and then OMV-associated  
416 virulence factors are differentially separated from vesicles during intracellular  
417 trafficking.<sup>57,58</sup> Recently, it was reported that in the case of Stx2 but not Stx1, once the  
418 toxin is internalized, it can be released from eukaryote cells in microvesicles that have  
419 exosome markers.<sup>59</sup> Therefore, immunity against Stx may be mediated by neutralizing  
420 Stx-specific antibodies or by immune mechanisms that prevent the toxin from entering  
421 the eukaryotic cell.

422 Our chimeric antigens did not display Stx-associated epitopes. Consequently, the  
423 protection conferred by intranasal immunizations against renal damage caused by  
424 STEC O91:H21 (**Fig. 5c-e, Table 4**) could be explained by two different mechanisms.  
425 The first, the generated immune response might reduce the intestinal colonization of  
426 the STEC O91:H21 strain, which could be correlated with a lower release and number  
427 of OMVs carrying Stx; however, the intestinal colonization by STEC O91:H21 was not  
428 measured. As a result, we cannot conclude that the decrease in colonization correlates  
429 with protection against renal damage. The second possible explanation is that sIgA

430 antibodies generated by intranasal immunizations could prevent the release and/or  
431 endocytosis of OMVs via immune exclusion. The latter explanation is supported by the  
432 fact that OmpT and Ag43 (a Cah homologue protein) are transported in OMVs.<sup>58,60</sup>

433 In some vaccines, it has been shown that the combination of administration routes, for  
434 example mucosal priming followed by systemic boosting or systemic priming followed  
435 by mucosal boosting, leads to robust humoral and cellular responses that improve their  
436 efficacy.<sup>68,69</sup> In future studies we will investigate whether the combination of systematic  
437 and mucosal immunizations with the Chi1 and Chi2 antigens leads to a more robust  
438 and complete immune response characterized by the production of both systemic and  
439 secretory antibodies. Also, we will endeavor to reveal the mechanism by which  
440 intranasal immunization with Chi1 and Chi2 confers protection against renal damage  
441 caused by STEC O91:H21.

442 Our main focus has always been to protect human health. This is based on the fact that  
443 we have seen that the selected antigens are present in a wide range of STEC  
444 serotypes previously associated to human illness. However, there are a number of  
445 studies that also link these virulence factors to interaction mechanisms between STEC  
446 and intestinal epithelial cells in cattle and pigs. In this context, we speculate that our  
447 candidate might also be used as a vaccine in animals to prevent STEC colonization,  
448 another way to protect the human health.

449 In conclusion, we developed a promising formulation based on recombinant chimeric  
450 proteins that confers protection against STEC intestinal colonization and more  
451 relevantly against renal damage caused by Stx. Our study presents interesting results  
452 that support the potential use of recombinant chimeras containing epitopes of different  
453 antigens of STEC as a preventive strategy.

454

## 455 **Methods**

### 456 **Bacterial strains and growth conditions**

457 Spontaneously derived streptomycin resistant (Str<sup>r</sup>) mutants of STEC O157:H7 86-24  
458 and STEC O91:H21 V07-4-4 strains were used in this study. Bacterial cultures were  
459 routinely grown at 37 °C in Luria-Bertani (LB) broth.

460

### 461 **Human sera**

462 Sera were obtained from 20 pediatric patients in the convalescent phase who  
463 presented diarrhea within two weeks prior to HUS diagnosis (HUS sera). Control sera

464 were obtained from two patients with no history of STEC-associated diarrhea. These  
465 sera were collected from 1990 to 1993 and from 1999 to 2003 in various healthcare  
466 centers in Santiago, Chile, with the written consent of the parents or legal guardians.  
467 All procedures were approved by the Ethics Committee of the Facultad de Medicina,  
468 Universidad de Chile.

469

#### 470 **Peptide Microarray**

471 Epitope mapping assays were performed by PEPperPRINT (Heidelberg, Germany).  
472 Briefly, the *ompT*, *cah* and *hes* sequences were translated into 15, 12 and 10 amino  
473 acid peptides with peptide-peptide overlaps of 14, 11 and 9 amino acids. The  
474 microarray contained peptides printed in duplicate framed by HA (YPYDVPDYAG)  
475 control peptides. Peptide slides were incubated with a mix of three HUS sera at a  
476 dilution of 1:100 followed by secondary antibody Goat anti-human IgA (DyLight800) at  
477 a dilution of 1:1000, in the presence of the monoclonal anti-HA (12CA5)-DyLight680  
478 control antibody at a dilution of 1:2000. The read-out was performed with a LI-COR  
479 Odyssey Imaging System and the image analysis with the PepSlide® Analyzer.

480

#### 481 ***In silico* prediction of B-cell and T-cell epitopes**

482 Prediction of B-cell epitopes was done using several tools available at the IEDB server  
483 <sup>70</sup>, including BepiPred 2.0 <sup>71</sup>, Kolaskar and Tongaonker antigenicity method <sup>72</sup> and  
484 Ellipro <sup>73</sup>. Peptides binding to MHC-II molecules were also predicted on the IEDB  
485 server <sup>70</sup>.

486

#### 487 **Validation of epitopes by ELISA assay**

488 Seventeen short peptides from 15 to 24 amino acids (**Table 1**) containing linear B-cell  
489 epitopes were chemically synthesized at Genic Bio Ltd (Shanghai, China). These short  
490 peptides were evaluated for their reactivity to IgG and IgA of individual HUS sera by  
491 ELISA. Briefly, 96-well ELISA plates (Nunc Maxisorp or Nunc Immobilizer Amino  
492 Plates, ThermoFisher, USA) were incubated with 1.2 µg of each peptide diluted in 100  
493 µl of phosphate-buffered saline (PBS; pH 7.2) overnight at 4 °C. Standard curves were  
494 obtained by dilutions in PBS of purified human IgG (Cat. 02-7102, Invitrogen, USA) or  
495 IgA (Cat. 3860-1AD-6, Mabtech, USA) ranging from 1.2 µg/ml to 0,0047 µg/ml. Plates  
496 were washed three times with PBS containing 0.05% Tween 20 (TPBS) and then  
497 incubated with blocking solution (TPBS + 0.5% bovine serum albumin) for 15 min at  
498 room temperature (RT). The HUS and control sera were diluted 1:25 (dilution  
499 determined from serum titration experiments in a range of 1:10 to 1:100) in blocking  
500 solution (100 µl / well) and incubated for 60 min at 37 °C. After six washes with T-PBS,

501 goat anti-human IgG (H + L), peroxidase-labeled (Cat. 04-10-06, KPL, USA) or goat  
502 anti-human IgA alpha chain (alkaline phosphatase) (Cat. Ab97212, Abcam, UK),  
503 diluted 1:1000 in blocking solution, were added and plates were incubated for 60 min at  
504 37 °C. After six washes with Tris-buffered saline (TBS; pH 7.5) containing 0.05%  
505 Tween 20, ABTS® peroxidase substrate (Cat. 50-66-18, KPL, USA) or pNPP substrate  
506 (Cat. N2600-10, USBiological, USA) were added and plates were incubated for 12 or  
507 30 min at RT, respectively. The reaction was stopped with 5% sodium dodecyl sulfate  
508 or 3 M sodium hydroxide dissolved in distilled water. The absorbance was determined  
509 at 405 nm ( $A_{450}$ ) using a Synergy HT microplate reader (Biotek Instruments, USA).  
510 Each sample was determined twice in duplicate. The relation between absorbance  
511 values and the IgG or IgA concentration of each well was calculated from standard  
512 curves using a four-parameter logistic regression in GraphPad Prism 8 software.

513

#### 514 ***In silico* modeling and design of chimeric proteins**

515 Predicted three-dimensional structure of Chimera 1 was constructed based on the  
516 crystal structures of the Opa60 (PDB\_ID: 2MLH)<sup>74</sup> and OmpT (PDB\_ID: 1178)<sup>75</sup>  
517 proteins. The template for Chimera 2 structure was the crystal structure of the Ag43  
518 protein (PDB\_ID: 4KH3).<sup>76</sup> Comparative modeling of chimeric proteins was performed  
519 in Modeller v9 software<sup>77</sup>, using default parameters. The modeled structures were  
520 solvated and embedded in a water box using ions (Na<sup>+</sup>, Cl<sup>-</sup>) to neutralize the system  
521 with the TCL script using VMD software.<sup>78</sup> The models were optimized with cycles of  
522 energy minimization and dynamics using the NAMD 2.12 software.<sup>79</sup> A molecular  
523 dynamics simulation was performed under periodic bordering conditions and isobaric-  
524 isothermal set (NPT). The entire system was relaxed by molecular dynamics (MD)  
525 simulations using NAMD 2.12 software for 10 ns and subsequently balanced for 30 ns,  
526 using the force field CHARMM v2.7.<sup>80</sup> Quality evaluation and validation of the models  
527 were carried out by Ramachandran plot analysis on the RAMPAGE server  
528 (<http://mordred.bioc.cam.ac.uk/~rapper/rampage.php>) and ProSA-web.<sup>81</sup> Chemical  
529 and physical properties of the chimeric proteins were predicted by Protein-Sol<sup>82</sup> and  
530 ProtParam<sup>83</sup> tools. The modelled structures were visualized with UCSF Chimera  
531 1.10.2.<sup>84</sup>

532

#### 533 **Purification of proteins**

534 Synthetic genes and production of Chimera 1, Chimera 2 and  $\alpha$ Cah proteins were  
535 ordered to GenScript (USA). Synthetic genes were optimized for *E. coli* expression and  
536 cloned into vector pET30a with N-terminal 6xHis-tag. *E. coli* strain BL21(DE3) was then  
537 transformed with recombinant plasmids containing synthetic genes. For purification of

538 recombinant proteins, transformant BL21(DE3) strains were grown in Terrific Broth  
539 containing kanamycin (50 µg/ml) at 37° C. When the culture reached an optical density  
540 at 600 nm of ~1.2, it was supplemented with IPTG for 4 h. Later, cells were harvested  
541 by centrifugation, resuspended with lysis buffer followed by sonication. The sediment  
542 obtained after centrifugation was dissolved using urea. Denatured protein was obtained  
543 by one-step purification using a Ni-column. The target protein was refolded and  
544 sterilized by 0.22 µm filter before being stored in aliquots. The concentration was  
545 determined by Bradford protein assay with BSA as standard. The protein purity and  
546 molecular weight were determined by standard SDS-PAGE along with Western blot  
547 confirmation (Supplementary Figure 1). Target proteins were obtained with purity >85%  
548 and endotoxin level <2 EU/mg (LAL Endotoxin Assay Kit, GenScript, Cat. No. L00350).  
549 In addition, reactivity of Chimeric and αCah proteins to IgG and IgA of individual HUS  
550 was assessed by ELISA assay as described above.

551

## 552 **Immunization studies**

553 All animal experiments were performed at the Universidad de Concepción,  
554 Concepción, Chile, following protocols and guidelines approved by the Bioethics  
555 Committee of the Faculty of Biological Sciences. Female BALB/c mice (5 to 6 weeks  
556 old; purchased from the Instituto de Salud Pública, Santiago, Chile) were randomly  
557 distributed into seven experimental groups (each group n=20) and housed in  
558 conventional animal facilities with water and food *ad libitum*. Mice were anesthetized  
559 with 10 mg/ml of ketamine and 250 µg/ml of acepromazine and immunized by  
560 intramuscular (i.m.) or intranasal (i.n.) route with the corresponding protein formulation  
561 along with 50 µl of Imject™ Alum Adjuvant (ThermoFisher Scientific, USA) or 20 µl of  
562 Sigma Adjuvant System® oil (Sigma-Aldrich, USA), respectively (**Fig. 1d**). The  
563 intramuscular immunization was performed in the hamstring muscle and the other  
564 group of animals immunized intranasally were anesthetized with a ketamine/xylazine  
565 mixture and the corresponding volume of vaccine was administered through the nose.  
566 Experimental groups 1, 3 and 5 were i.m. immunized with either 20 µg of Chi1, 20 µg of  
567 Chi2 or 10 µg of Chi1 plus 10 µg of Chi2, respectively. Experimental groups 2, 4 and 6  
568 were i.n. immunized with either 20 µg of Chi1, 20 µg of Chi2 or 10 µg of Chi1 plus 10  
569 µg of Chi2, respectively. The control group were injected with PBS plus adjuvants. Two  
570 booster immunizations were performed on days 15 and 30 using similar amounts of  
571 protein formulations and adjuvants. In the BALB/c model, STEC O157:H7 does not  
572 cause morbidity or mortality but does allow us to evaluate intestinal colonization.<sup>85</sup> In  
573 contrast, STEC O91:H21 and its mucus-activated Shiga toxin variant 2d (Stx2d)  
574 allowed us to measure kidney damage in infected BALB/c mice.<sup>86,87</sup>



575

### 576 **Sera and feces collection**

577 Sera were obtained from five mice per group by tail vein bleeding on days -2, 14 and  
578 28 before each immunization and at day 42 (two weeks after the last booster  
579 immunization), according to conventional techniques. Briefly, blood samples were left  
580 at 37 °C for 30 min and then centrifuged at 1,000 x g for 10 min. Supernatant was  
581 collected, the complement was inactivated at 56 °C for 30 min and aliquots were stored  
582 at -80 °C until IgG, IgA and IgM determinations by ELISA. For secretory IgA (sIgA)  
583 measurement, feces were collected on days -2, 14, 28 and 42. Feces were weight,  
584 homogenized and diluted to 0.1 g/ml with PBS containing 0.1% sodium azide and 1  
585 mM of phenylmethylsulfonyl fluoride (PMSF). Fecal suspension was centrifuged at  
586 15,000 x g for 5 min at 4 °C, the supernatant fluid recovered and again centrifuged at  
587 15,000 x g for 15 min at 4 °C and stored at -80 °C until use.

588

### 589 **Measurement of humoral response**

590 Chimeric proteins were diluted to 1 µg/ml in carbonate buffer (pH 9.6) and used to coat  
591 polystyrene 96-well high-binding ELISA plates (100 µl/well; Nunc-Immuno plate with  
592 MaxiSorp surface). After overnight incubation at 4 °C, plates were washed with  
593 washing buffer (Tris-buffered saline [pH 7.4] with 0.05% Tween 20) and blocked with  
594 0.8% gelatin in TPBS for 1 h at 37 °C and then incubated with either sera or  
595 supernatant from fecal suspensions, at a dilution of 1:100, for 2.5 h at room  
596 temperature and washed four times. Next, isotype-specific goat anti-mouse HRP  
597 conjugates (BioLegend, USA) were added (100 µl/well) at a dilution of 1:1000 and  
598 incubated for 1 h min at room temperature followed by washing with TPBS. Then, 200  
599 µl/well of OPD Peroxidase Substrate (Cat. P9187-5SET, Sigma-Aldric, USA) was  
600 added for 30 min. The reaction was stopped with 50 µl/well of 2 N H<sub>2</sub>SO<sub>4</sub> and the  
601 absorbance at 450 nm was measured on a microplate reader.

602

### 603 **Challenge studies**

604 Two weeks after the last booster immunization (day 45), the infection experiments were  
605 performed in the streptomycin-treated mouse model of STEC infection as described  
606 elsewhere<sup>87,88</sup> with minor modifications. Briefly, mice were given water *ad libitum*  
607 containing streptomycin (5 g/l) 24–48 h prior to inoculation and for the duration of the  
608 experiment. Feces were documented to be free of streptomycin-resistant *E. coli* at the  
609 time of inoculation. STEC O157:H7 86-24 and STEC O91:H21 V07-4-4 strains were  
610 grown overnight in agitated LB broth containing 50 µg/ml streptomycin at 37 °C.  
611 Cultures were centrifuged, washed once with PBS and resuspended in a 20% sucrose

612 (w/v) and 10% NaHCO<sub>3</sub> (w/v) solution in sterile water to 1 x 10<sup>10</sup> CFU/ml (STEC 86-24  
613 strain) or 1 x 10<sup>6</sup> CFU/ml (STEC V07-4-4 strain). Prior to inoculation, mice were starved  
614 of food and water overnight (12 h). The next morning mice were orally infected by  
615 pipette feeding with 100 µl of bacterial suspension containing 10<sup>9</sup> CFU or 10<sup>5</sup> CFU of  
616 STEC 86-24 or STEC V07-4-4 strains, respectively. After challenge, food and water  
617 were reintroduced and provided *ad libitum*. The fecal shedding of the 86-24 strain was  
618 recorded daily for 12 days. For this, feces were collected, weighed, homogenized,  
619 suspended in 1 ml PBS and, after serial dilutions, plated on MacConkey agar plates  
620 supplemented with streptomycin (50 µg/ml) for bacterial counts. For determination of  
621 intestinal colonization of the STEC 86-24 strain, 12 days after challenge (day 57), mice  
622 were euthanized, and cecum was collected under aseptic conditions, homogenized and  
623 diluted in PBS. Suspensions were serially diluted and plated on MacConkey  
624 supplemented with streptomycin (50 µg/ml) for bacterial counts. Log<sub>10</sub> units of  
625 protection were obtained by subtracting the mean Log<sub>10</sub> CFU for each experimental  
626 group from the mean Log<sub>10</sub> CFU of the PBS control group. Mice inoculated with the  
627 STEC V07-4-4 strain were used to measure kidney damage (*vide infra*).

628

### 629 **Urinalysis**

630 Urine samples were collected as previously described<sup>89</sup>, on days 45, 51 and 57 (0, 7  
631 and 12 post-infection, respectively) from mice infected with the STEC V07-4-4 strain.  
632 Biochemical estimation of urine creatinine concentration was assessed using the  
633 Creatinine Kit (BioSystems, Spain) according to the manufacturer's instructions. Other  
634 clinical urine markers were measured by using Combur10 Test®M semiquantitative  
635 test strips (Roche Diagnostics GmbH, Germany). Each test strip consists of  
636 colorimetric reaction spots for 10 markers: specific gravity (1.000 to 1.030), pH (5.0 to  
637 9.0), leukocytes (range, negative to 500 cells/µL), nitrites (negative or positive),  
638 proteins (negative to 500 mg/dl), glucose (negative to 55 mmol/l), ketones (negative to  
639 15 mmol/L), urobilinogen (normal to 200 µmol/L), bilirubin (negative to +3) and blood  
640 (negative; trace of non-hemolyzed; or hemolyzed, 10 to 250 cells/µL). Each square was  
641 wet with a drop of urine and the marker value was determined through comparison with  
642 a colorimetric standard.

643

### 644 **Histopathological analysis of kidney tissue**

645 For the histological analysis of kidney tissue, mice infected with the STEC V07-4-4  
646 strain were euthanized at day 57, the kidneys collected, fixed in 10% formaldehyde (pH  
647 6.9), embedded in paraffin wax for sectioning at 5 µm and stained with hematoxylin and  
648 eosin (H/E). Pathological evaluation of H/E-stained tissue sections was carried out by a

649 pathologist blinded to the experimental design. Histopathological changes were  
650 evaluated by the degree of perivascular edema, leukocyte infiltration, vascular  
651 congestion, mesangial cell expansion and injury of the glomerular filtration barrier  
652 (glomerular hypertrophy or glomerular hypoperfusion). Each sample was quantitated by  
653 ten randomly selected fields with the following criteria: 0, no damage; 1, <25%; 2, 25–  
654 50%; 3, >50%; 4, >75% of damage. Differences between experimental groups were  
655 evaluated by a one-way ANOVA followed by Tukey's multiple comparisons test.

656

657

658

659

660

661

662

663

664

665

666

667

668

669

670

671

672

673

674

675

676

677

678

679

680

681

682

683 **Data availability**

684 The data that support the findings of this study are available on request from the  
685 corresponding author R.V. Amino acid sequences of Chimeric proteins and identified  
686 epitopes are not publicly available due to legal restrictions and an ongoing international  
687 patent application.

688

689 **Acknowledgments**

690 This study was supported by FONDEF ID16I10140 and FONDECYT 1161161 grants.  
691 We thank Dr. Helen Lowry for the careful revision and edition of the manuscript. We  
692 thank Dr. Mauricio Farfán for sharing the STEC O157:H7 str. 86-24.

693

694 **Competing Interests**

695 Currently, an application for an international patent had been presented for the  
696 chimeric antigens developed and uses thereof (PCT/IB2019/054554). The authors  
697 declare that the research was conducted in the absence of any commercial or financial  
698 relationships that could be construed as a potential conflict of interest.

699

700 **Author contributions**

701 Conceptualization and experimental design: Roberto Vidal, David A. Montero, Felipe  
702 Del Canto, Juan C. Salazar and Angel Oñate. Data acquisition: Sandra Céspedes,  
703 Leandro Cádiz, José Reyes, Mauricio Arenas and David A. Montero. Data analysis and  
704 interpretation: Roberto Vidal, David A. Montero, Felipe Del Canto, Juan C. Salazar and  
705 Angel Oñate. Writing – original draft: David A. Montero; Review and edition: Roberto  
706 Vidal, Felipe Del Canto, Juan C. Salazar, Mauricio Arenas and Angel Oñate.

707

708

709

710

711

712

713

714

715

716

717

718 **References**

- 719 1 Nataro JP, Kaper JB. Diarrheagenic *Escherichia coli*. *Clin Microbiol Rev* 1998;  
720 11: 142–201.
- 721 2 Freedman SB, Xie J, Neufeld MS, Hamilton WL, Hartling L, Tarr PI. Shiga toxin–  
722 producing *Escherichia coli* infection, antibiotics, and risk of developing Hemolytic  
723 Uremic Syndrome: A meta-analysis. *Clin Infect Dis* 2016; 62: 1251–1258.
- 724 3 Thallion Pharmaceuticals. Study of chimeric monoclonal antibodies to Shiga  
725 Toxins 1 and 2. ClinicalTrials.gov Identifier: NCT01252199.  
726 2013.<https://clinicaltrials.gov/ct2/show/study/NCT01252199>.
- 727 4 Immunova S.A. Anti-shiga toxin hyperimmune equine immunoglobulin F(ab')<sub>2</sub>  
728 fragment (INM004) in healthy volunteers. ClinicalTrials.gov Identifier:  
729 NCT03388216. 2019. <https://clinicaltrials.gov/ct2/show/study/NCT03388216>.
- 730 5 Majowicz SE, Scallan E, Jones-Bitton A, Sargeant JM, Stapleton J, Angulo FJ *et*  
731 *al.* Global incidence of human Shiga toxin–producing *Escherichia coli* infections  
732 and deaths: A systematic review and knowledge synthesis. *Foodborne Pathog*  
733 *Dis* 2014; 11: 447–455.
- 734 6 Hazard identification and characterization: Criteria for categorizing Shiga Toxin–  
735 producing *Escherichia coli* on a risk basis. *J Food Prot* 2019; 82: 7–21.
- 736 7 Lee MS, Tesh VL. Roles of shiga toxins in immunopathology. *Toxins (Basel)*  
737 2019; 11: 1–26.
- 738 8 Farfán MJ, Torres AG. Molecular mechanisms that mediate colonization of Shiga  
739 toxin-producing *Escherichia coli* strains. *Infect Immun* 2012; 80: 903–913.
- 740 9 Montero DA, Velasco J, Del Canto F, Puente JL, Padola NL, Rasko DA *et al.*  
741 Locus of Adhesion and Autoaggregation (LAA), a pathogenicity island present in  
742 emerging Shiga Toxin-producing *Escherichia coli* strains. *Sci Rep* 2017; 7: 7011.
- 743 10 Montero DA, Canto F Del, Velasco J, Colello R, Padola NL, Salazar JC *et al.*  
744 Cumulative acquisition of pathogenicity islands has shaped virulence potential  
745 and contributed to the emergence of LEE-negative Shiga toxin-producing  
746 *Escherichia coli* strains. *Emerg Microbes Infect* 2019; 8: 486–502.
- 747 11 Coombes BK, Wickham ME, Mascarenhas M, Gruenheid S, Finlay BB, Karmali  
748 M a. Molecular analysis as an aid to assess the public health risk of non-O157  
749 shiga toxin-producing *Escherichia coli* strains. *Appl Environ Microbiol* 2008; 74:

- 750 2153–2160.
- 751 12 O’Ryan M, Vidal R, del Canto F, Carlos Salazar J, Montero D. Vaccines for viral  
752 and bacterial pathogens causing acute gastroenteritis: Part II: Vaccines for  
753 *Shigella*, *Salmonella*, enterotoxigenic *E. coli* (ETEC), enterohemorrhagic *E. coli*  
754 (EHEC) and *Campylobacter jejuni*. *Hum Vaccin Immunother* 2015; **11**: 601–619.
- 755 13 Montero D, Orellana P, Gutiérrez D, Araya D, Salazar JC, Prado V *et al.*  
756 Immunoproteomic analysis to identify Shiga toxin-producing *Escherichia coli*  
757 outer membrane proteins expressed during human infection. *Infect Immun* 2014;  
758 **82**: 4767–4777.
- 759 14 Garcia-Angulo V a, Kalita A, Torres AG. Advances in the development of  
760 enterohemorrhagic *Escherichia coli* vaccines using murine models of infection.  
761 *Vaccine* 2013; **31**: 3229–3235.
- 762 15 Cai K, Gao X, Li T, Wang Q, Hou X, Tu W *et al.* Enhanced immunogenicity of a  
763 novel Stx2Am-Stx1B fusion protein in a mice model of enterohemorrhagic  
764 *Escherichia coli* O157:H7 infection. *Vaccine* 2011; **29**: 946–952.
- 765 16 Mejias MP, Ghersi G, Craig PO, Panek CA, Bentancor L V, Baschkier A *et al.*  
766 Immunization with a chimera consisting of the B subunit of Shiga toxin type 2  
767 and brucella lumazine synthase confers total protection against Shiga toxins in  
768 mice. *J Immunol* 2013; **191**: 2403–2411.
- 769 17 Martorelli L, Garimano N, Fiorentino GA, Vilte DA, Garbaccio SG, Barth SA *et al.*  
770 Efficacy of a recombinant Intimin, EspB and Shiga toxin 2B vaccine in calves  
771 experimentally challenged with *Escherichia coli* O157:H7. *Vaccine* 2018; **36**:  
772 3949–3959.
- 773 18 Gu J, Liu Y, Yu S, Wang H, Wang Q, Yi Y *et al.* Enterohemorrhagic *Escherichia*  
774 *coli* trivalent recombinant vaccine containing EspA, intimin and Stx2 induces  
775 strong humoral immune response and confers protection in mice. *Microbes*  
776 *Infect* 2009; **11**: 835–841.
- 777 19 Cheng Y, Feng Y, Luo P, Gu J, Yu S, Zhang W *et al.* Fusion expression and  
778 immunogenicity of EHEC EspA-Stx2AI protein: Implications for the vaccine  
779 development. *J Microbiol* 2009; **47**: 498–505.
- 780 20 Gao X, Cai K, Li T, Wang Q, Hou X, Tian R *et al.* Novel fusion protein protects  
781 against adherence and toxicity of enterohemorrhagic *Escherichia coli* O157:H7  
782 in mice. *Vaccine* 2011; **29**: 6656–6663.

- 783 21 Wan C, Zhou Y, Yu Y, Peng LJ, Zhao W, Zheng X. B-cell epitope KT-12 of  
784 enterohemorrhagic *Escherichia coli* O157:H7: A novel peptide vaccine  
785 candidate. *Microbiol Immunol* 2011; **55**: 247–253.
- 786 22 Liu J, Sun Y, Feng S, Zhu L, Guo X, Qi C. Towards an attenuated  
787 enterohemorrhagic *Escherichia coli* O157:H7 vaccine characterized by a deleted  
788 ler gene and containing apathogenic Shiga toxins. *Vaccine* 2009; **27**: 5929–  
789 5935.
- 790 23 Cai K, Tu W, Liu Y, Li T, Wang H. Novel fusion antigen displayed-bacterial  
791 ghosts vaccine candidate against infection of *Escherichia coli* O157:H7. *Sci Rep*  
792 2015; **5**: 17479.
- 793 24 García-Angulo VA, Kalita A, Kalita M, Lozano L, Torres AG. Comparative  
794 genomics and immunoinformatics approach for the identification of vaccine  
795 candidates for enterohemorrhagic *Escherichia coli* O157:H7. *Infect Immun* 2014;  
796 **82**: 2016–2026.
- 797 25 Riquelme-Neira R, Rivera A, Sáez D, Fernández P, Osorio G, del Canto F *et al.*  
798 Vaccination with DNA encoding truncated enterohemorrhagic *Escherichia coli*  
799 (EHEC) Factor for Adherence-1 gene (efa-1') confers protective immunity to  
800 mice infected with *E. coli* O157:H7. *Front Cell Infect Microbiol* 2016; **5**: 1–9.
- 801 26 Sanchez-Villamil JI, Tapia D, Torres AG. Development of a gold nanoparticle  
802 vaccine against Enterohemorrhagic *Escherichia coli* O157:H7. *mBio* 2019; **10**:  
803 pii: e01869-19.
- 804 27 John M, Kudva IT, Griffin RW, Dodson AW, McManus B, Krastins B *et al.* Use of  
805 *in vivo*-induced antigen technology for identification of *Escherichia coli* O157:H7  
806 proteins expressed during human infection. *Infect Immun* 2005; **73**: 2665–2679.
- 807 28 Colello R, Vélez MV, González J, Montero DA, Bustamante A V, Canto F Del *et al.*  
808 First report of the distribution of Locus of Adhesion and Autoaggregation  
809 (LAA) pathogenicity island in LEE-negative Shiga toxin-producing *Escherichia*  
810 *coli* isolates from Argentina. *Microb Pathog* 2018; **123**: 259–263.
- 811 29 Carpenter EP, Beis K, Cameron AD, Iwata S. Overcoming the challenges of  
812 membrane protein crystallography. *Curr Opin Struct Biol* 2008; **18**: 581–586.
- 813 30 Kaumaya PTP, Kobs-Conrad S, Seo YH, Lee H, Vanbuskirk AM, Feng N *et al.*  
814 Peptide vaccines incorporating a 'promiscuous' T-cell epitope bypass certain  
815 haplotype restricted immune responses and provide broad spectrum

- 816 immunogenicity. *J Mol Recognit* 1993; **6**: 81–94.
- 817 31 Reed SG, Orr MT, Fox CB. Key roles of adjuvants in modern vaccines. *Nat Med*  
818 2013; **19**: 1597–1608.
- 819 32 Mohanan D, Slütter B, Henriksen-Lacey M, Jiskoot W, Bouwstra JA, Perrie Y *et*  
820 *al.* Administration routes affect the quality of immune responses: A cross-  
821 sectional evaluation of particulate antigen-delivery systems. *J Control Release*  
822 2010; **147**: 342–349.
- 823 33 Belyakov IM, Ahlers JD. What role does the route of immunization play in the  
824 generation of protective immunity against mucosal pathogens? *J Immunol* 2009;  
825 **183**: 6883–6892.
- 826 34 Melton-Celsa AR, O'Brien AD, Feng PCH. Virulence potential of activatable  
827 Shiga Toxin 2d-producing *Escherichia coli* isolates from fresh produce. *J Food*  
828 *Prot* 2015; **78**: 2085–2088.
- 829 35 Melton-Celsa AR, Darnell SC, O'Brien AD. Activation of Shiga-like toxins by  
830 mouse and human intestinal mucus correlates with virulence of  
831 enterohemorrhagic *Escherichia coli* O91:H21 isolates in orally infected,  
832 streptomycin-treated mice. *Infect Immun* 1996; **64**: 1569–76.
- 833 36 Commereuc M, Weill F-X, Loukiadis E, Gouali M, Gleizal A, Kormann R *et al.*  
834 Recurrent hemolytic and uremic syndrome induced by *Escherichia coli*. *Medicine*  
835 (*Baltimore*) 2016; **95**: e2050.
- 836 37 Siegler RL, Griffin PM, Barrett TJ, Strockbine NA. Recurrent hemolytic uremic  
837 syndrome secondary to *Escherichia coli* O157:H7 infection. *Pediatrics* 1993; **91**:  
838 666–668.
- 839 38 Cox MMJ. Recombinant protein vaccines produced in insect cells. *Vaccine* 2012;  
840 **30**: 1759–1766.
- 841 39 Hollingshead S, Jongerius I, Exley RM, Johnson S, Lea SM, Tang CM.  
842 Structure-based design of chimeric antigens for multivalent protein vaccines. *Nat*  
843 *Commun* 2018; **9**: 1–10.
- 844 40 Li W, Joshi M, Singhania S, Ramsey K, Murthy A. Peptide Vaccine: Progress  
845 and challenges. *Vaccines* 2014; **2**: 515–536.
- 846 41 Chang YF, Chen CS, Palaniappan RUM, He H, McDonough SP, Barr SC *et al.*  
847 Immunogenicity of the recombinant leptospiral putative outer membrane proteins



- 848 as vaccine candidates. *Vaccine* 2007; **25**: 8190–8197.
- 849 42 Tapia D, Ross BN, Kalita A, Kalita M, Hatcher CL, Muruato LA *et al.* From *in*  
850 *silico* protein epitope density prediction to testing *Escherichia coli* O157:H7  
851 vaccine candidates in a murine model of colonization. *Front Cell Infect Microbiol*  
852 2016; **6**: 1–8.
- 853 43 Wells TJ, Tree JJ, Ulett GC, Schembri M a. Autotransporter proteins: novel  
854 targets at the bacterial cell surface. *FEMS Microbiol Lett* 2007; **274**: 163–172.
- 855 44 Harris J a., Roy K, Woo-Rasberry V, Hamilton DJ, Kansal R, Qadri F *et al.*  
856 Directed evaluation of Enterotoxigenic *Escherichia coli* autotransporter proteins  
857 as putative vaccine candidates. *PLoS Negl Trop Dis* 2011; **5**: e1428.
- 858 45 Klein NP. Licensed pertussis vaccines in the United States. *Hum Vaccin*  
859 *Immunother* 2014; **10**: 2684–2690.
- 860 46 Su F, Patel GB, Hu S, Chen W. Induction of mucosal immunity through systemic  
861 immunization: Phantom or reality? *Hum Vaccines Immunother* 2016; **12**: 1070–  
862 1079.
- 863 47 Clements JD, Freytag LC. Parenteral vaccination can be an effective means of  
864 inducing protective mucosal responses. *Clin Vaccine Immunol* 2016; **23**: 438–  
865 441.
- 866 48 Brandtzaeg P. Mucosal immunity: Induction, dissemination, and effector  
867 functions. *Scand J Immunol* 2009; **70**: 505–515.
- 868 49 Eckmann L, Stappenbeck TS. IgG ‘detoxes’ the intestinal mucosa. *Cell Host*  
869 *Microbe* 2015; **17**: 538–539.
- 870 50 Horton RE, Vidarsson G. Antibodies and their receptors: Different potential roles  
871 in mucosal defense. *Front Immunol* 2013; **4**.
- 872 51 Kamada N, Sakamoto K, Seo S-U, Zeng MY, Kim Y-G, Cascalho M *et al.*  
873 Humoral immunity in the gut selectively targets phenotypically virulent attaching-  
874 and-effacing bacteria for intraluminal elimination. *Cell Host Microbe* 2015; **17**:  
875 617–627.
- 876 52 Westerman LE, McClure HM, Jiang B, Almond JW, Glass RI. Serum IgG  
877 mediates mucosal immunity against rotavirus infection. *Proc Natl Acad Sci* 2005;  
878 **102**: 7268–7273.
- 879 53 Saito K, Suzuki R, Koyanagi Y, Isogai H, Yoneyama H, Isogai E. Inhibition of

- 880           enterohemorrhagic *Escherichia coli* O157:H7 infection in a gnotobiotic mouse  
881           model with pre-colonization by bacteroides strains. *Biomed Reports* 2019; **10**:  
882           175–182.
- 883   54    Amani J, Salmanian AH, Rafati S, Mousavi SL. Immunogenic properties of  
884           chimeric protein from *espA*, *eae* and *tir* genes of *Escherichia coli* O157:H7.  
885           *Vaccine* 2010; **28**: 6923–6929.
- 886   55    Kolling GL, Matthews KR. Export of virulence genes and Shiga toxin by  
887           membrane vesicles of *Escherichia coli* O157:H7. *Appl Environ Microbiol* 1999;  
888           **65**: 1843–1848.
- 889   56    Kim SH, Lee SR, Kim KS, Ko A, Kim E, Kim YH *et al.* Shiga toxin A subunit  
890           mutant of *Escherichia coli* O157:H7 releases outer membrane vesicles  
891           containing the B-pentameric complex. *FEMS Immunol Med Microbiol* 2010; **58**:  
892           412–420.
- 893   57    Kunsmann L, Rüter C, Bauwens A, Greune L, Glüder M, Kemper B *et al.*  
894           Virulence from vesicles: Novel mechanisms of host cell injury by *Escherichia coli*  
895           O104:H4 outbreak strain. *Sci Rep* 2015; **5**:13252.
- 896   58    Bielaszewska M, Rü Ter 2 C, Bauwens A, Greune L, Jarosch K-A, Steil D *et al.*  
897           Host cell interactions of outer membrane vesicle-associated virulence factors of  
898           enterohemorrhagic *Escherichia coli* O157: Intracellular delivery, trafficking and  
899           mechanisms of cell injury. *PLoS Pathog* 2017; **13**: e1006159.
- 900   59    Watanabe-Takahashi M, Yamasaki S, Murata M, Kano F, Motoyama J, Yamate  
901           J *et al.* Exosome-associated Shiga toxin 2 is released from cells and causes  
902           severe toxicity in mice. *Sci Rep* 2018; **8**: 10776.
- 903   60    Boysen A, Borch J, Krogh J, Hjernø K, Møller-Jensen J. SILAC-based  
904           comparative analysis of pathogenic *Escherichia coli* secretomes. *J Microbiol*  
905           *Methods* 2015; **116**: 66–79.
- 906   61    Premjani V, Tilley D, Gruenheid S, Le Moual H, Samis JA. Enterohemorrhagic  
907           *Escherichia coli* OmpT regulates outer membrane vesicle biogenesis. *FEMS*  
908           *Microbiol Lett* 2014; **355**: 185-192.
- 909   62    Babiuk S, Asper DJ, Rogan D, Mutwiri GK, Potter A a. Subcutaneous and  
910           intranasal immunization with type III secreted proteins can prevent colonization  
911           and shedding of *Escherichia coli* O157:H7 in mice. *Microb Pathog* 2008; **45**: 7–  
912           11.

- 913 63 Gu J, Liu Y, Yu S, Wang H, Wang Q, Yi Y *et al.* Enterohemorrhagic *Escherichia*  
914 *coli* trivalent recombinant vaccine containing EspA, intimin and Stx2 induces  
915 strong humoral immune response and confers protection in mice. *Microbes*  
916 *Infect* 2009; **11**: 835–841.
- 917 64 Zhang X-H, He K-W, Zhang S-X, Lu W-C, Zhao P-D, Luan X-T *et al.*  
918 Subcutaneous and intranasal immunization with Stx2B-Tir-Stx1B-Zot reduces  
919 colonization and shedding of *Escherichia coli* O157:H7 in mice. *Vaccine* 2011;  
920 **29**: 3923–3929.
- 921 65 Iannino F, Herrmann CK, Roset MS, Briones G. Development of a dual vaccine  
922 for prevention of *Brucella abortus* infection and *Escherichia coli* O157:H7  
923 intestinal colonization. *Vaccine* 2015; **33**: 2248–2253.
- 924 66 Torres AG, Perna NT, Burland V, Ruknudin A, Blattner FR, Kaper JB.  
925 Characterization of Cah, a calcium-binding and heat-extractable autotransporter  
926 protein of enterohaemorrhagic *Escherichia coli*. *Mol Microbiol* 2002; **45**: 951–  
927 966.
- 928 67 Urashima A, Sanou A, Yen H, Tobe T. Enterohaemorrhagic *Escherichia coli*  
929 produces outer membrane vesicles as an active defence system against  
930 antimicrobial peptide LL-37. *Cell Microbiol* 2017; **19**: 1–11.
- 931 68 Ralli-Jain P, Tifrea D, Cheng C, Pal S, de la Maza LM. Enhancement of the  
932 protective efficacy of a *Chlamydia trachomatis* recombinant vaccine by  
933 combining systemic and mucosal routes for immunization. *Vaccine* 2010; **28**:  
934 7659–7666.
- 935 69 Vajdy M, Singh M, Ugozzoli M, Briones M, Soenawan E, Cuadra L *et al.*  
936 Enhanced mucosal and systemic immune responses to *Helicobacter pylori*  
937 antigens through mucosal priming followed by systemic boosting immunizations.  
938 *Immunology* 2003; **110**: 86–94.
- 939 70 Kim Y, Ponomarenko J, Zhu Z, Tamang D, Wang P, Greenbaum J *et al.* Immune  
940 epitope database analysis resource. *Nucleic Acids Res* 2012; **40**: 525–530.
- 941 71 Jespersen MC, Peters B, Nielsen M, Marcatili P. BepiPred-2.0: Improving  
942 sequence-based B-cell epitope prediction using conformational epitopes. *Nucleic*  
943 *Acids Res* 2017; **45**: W24–W29.
- 944 72 Kolaskar a S, Tongaonkar PC. A semi-empirical method for prediction of  
945 antigenic determinants on protein antigens. *FEBS Lett* 1990; **276**: 172–174.

- 946 73 Ponomarenko J, Bui H-H, Li W, Fussedder N, Bourne PE, Sette A *et al.* ElliPro: a  
947 new structure-based tool for the prediction of antibody epitopes. *BMC*  
948 *Bioinformatics* 2008; **9**: 514.
- 949 74 Horst R, Stanczak P, Wüthrich K. NMR Polypeptide backbone conformation of  
950 the *E. coli* outer membrane protein W. *Structure* 2014; **22**: 1204–1209.
- 951 75 Vandeputte-Rutten L, Kramer RA, Kroon J, Dekker N, Egmond MR, Gros P.  
952 Crystal structure of the outer membrane protease OmpT from *Escherichia coli*  
953 suggests a novel catalytic site. *EMBO J* 2001; **20**: 5033–5039.
- 954 76 Heras B, Totsika M, Peters KM, Paxman JJ, Gee CL, Jarrott RJ. The antigen 43  
955 structure reveals a molecular Velcro-like mechanism of autotransporter-  
956 mediated bacterial clumping. *Proc Natl Acad Sci U S A* 2014; **111**: 457–462.
- 957 77 Sánchez R, Šali A. Evaluation of comparative protein structure modeling by  
958 MODELLER-3. *Proteins Struct Funct Genet* 1997; **29**: 50–58.
- 959 78 Ricker EW. Stoch and recruitment. *J Fish Res Board Canada* 1954; **11**: 559–  
960 623.
- 961 79 Biller JR, Elajaili H, Meyer V, Rosen GM, Eaton SS, Eaton GR. Electron spin–  
962 lattice relaxation mechanisms of rapidly-tumbling nitroxide radicals. *J Magn*  
963 *Reson* 2013; **236**: 47–56.
- 964 80 Foloppe N, Mackerell AD. All-atom empirical force field for nucleic acids: I.  
965 Parameter optimization based on small molecule and condensed phase  
966 macromolecular target data. *J Comput Chem* 2000; **21**: 86–104.
- 967 81 Wiederstein M, Sippl MJ. ProSA-web: Interactive web service for the recognition  
968 of errors in three-dimensional structures of proteins. *Nucleic Acids Res* 2007; **35**:  
969 407–410.
- 970 82 Hebditch M, Carballo-Amador MA, Charonis S, Curtis R, Warwicker J. Protein-  
971 Sol: A web tool for predicting protein solubility from sequence. *Bioinformatics*  
972 2017; **33**: 3098–3100.
- 973 83 Wilkins MR, Gasteiger E, Bairoch A, Sanchez JC, Williams KL, Appel RD *et al.*  
974 Protein identification and analysis tools in the ExPASy server. *Methods Mol Biol*  
975 1999; **112**: 531–552.
- 976 84 Pettersen EF, Goddard TD, Huang CC, Couch GS, Greenblatt DM, Meng EC *et*  
977 *al.* UCSF chimera - A visualization system for exploratory research and analysis.

- 978 *J Comput Chem* 2004; **25**: 1605–1612.
- 979 85 Mohawk KL, O'Brien AD. Mouse models of *Escherichia coli* O157:H7 infection  
980 and shiga toxin injection. *J Biomed Biotechnol* 2011; **2011**: 258185.
- 981 86 Melton-Celsa AR, Rogers JE, Schmitt CK, Darnell SC, O'Brien AD. Virulence of  
982 Shiga toxin-producing *Escherichia coli* (STEC) in orally-infected mice correlates  
983 with the type of toxin produced by the infecting strain. *Jpn J Med Sci Biol* 1998;  
984 **51 Suppl**: S108-14.
- 985 87 Lindgren SW, Melton AR, O'Brien AD. Virulence of enterohemorrhagic  
986 *Escherichia coli* O91:H21 clinical isolates in an orally infected mouse model.  
987 *Infect Immun* 1993; **61**: 3832–3842.
- 988 88 Wadolowski E a., Burriss J a., O'Brien a. D. Mouse model for colonization and  
989 disease caused by enterohemorrhagic *Escherichia coli* O157:H7. *Infect Immun*  
990 1990; **58**: 2438–2445.
- 991 89 Kurien BT, Hal Scofield R. Mouse urine collection using clear plastic wrap. *Lab*  
992 *Anim* 1999; **33**: 83–86.
- 993 90 Warnes GR, Bolker B, Bonebakker L, Gentleman R, Huber W, Lumley T *et al.* R  
994 Package ' gplots '. 2016.[https://cran.r-](https://cran.r-project.org/web/packages/gplots/gplots.pdf)  
995 [project.org/web/packages/gplots/gplots.pdf](https://cran.r-project.org/web/packages/gplots/gplots.pdf).
- 996 91 R Core Team. *R: A Language and Environment for Statistical Computing*. R  
997 Foundation for Statistical Computing. Vienna, Austria., 2014 [http://www.r-](http://www.r-project.org)  
998 [project.org](http://www.r-project.org).
- 999 92 Guruprasad K, Reddy BVB, Pandit MW. Correlation between stability of a  
1000 protein and its dipeptide composition: A novel approach for predicting *in vivo*  
1001 stability of a protein from its primary sequence. *Protein Eng Des Sel* 1990; **4**:  
1002 155–161.

1003  
1004  
1005  
1006  
1007  
1008  
1009  
1010

1011 **Figure Legends**

1012

1013 **Fig. 1. Experimental design for the development and evaluation of the chimeric-**  
1014 **based STEC vaccine.** a) We selected the OmpT, Cah and Hes proteins as suitable  
1015 targets against STEC based on their antigenic properties, frequency of detection  
1016 among clinical STEC strains and absence among commensal *E. coli* strains. b) The  
1017 proteins were analyzed by immunoinformatics tools and a peptide microarray assay for  
1018 B-cell epitope prediction and mapping, respectively. MHC-II epitopes were also  
1019 predicted *in silico*. Several B-cell epitopes were validated by ELISA using a collection  
1020 of HUS sera. c) Selected epitopes were used to design two chimeric proteins that were  
1021 expressed and purified. The reactivity of the chimeric proteins to IgG and IgA present in  
1022 HUS sera was also confirmed. d) BALB/c mice were immunized with different vaccine  
1023 formulations by intramuscular or intranasal route using Imject Alum (IA) or Sigma  
1024 adjuvant (SA), respectively. Systemic and local humoral responses were subsequently  
1025 determined. The protection conferred by immunizations was evaluated in the  
1026 streptomycin-treated mouse model by challenge with STEC O157:H7 and O91:H21  
1027 strains. Bacterial shedding and intestinal colonization were determined for the STEC  
1028 O157:H7 infected mice. Renal damage was examined in the STEC O91:H21 infected  
1029 mice.  
1030

1031 **Fig. 2. Identification and validation of linear B-cell epitopes of the OmpT, Cah and**  
1032 **Hes proteins.** a, b and c) Peptide microarray assays. Peptide slides containing 15, 12  
1033 and 10 AA peptides derived from de OmpT (a), Cah (b) and Hes (c) proteins were  
1034 incubated with a mix of three HUS sera at a dilution of 1:100. After washing, staining  
1035 was performed with secondary anti-human IgA DyLight800 antibody at a dilution of  
1036 1:1000. Control peptides (red spots) framing the peptide slides were staining with  
1037 specific monoclonal DyLight680 antibody at a dilution of 1:2000. Control peptide slides  
1038 incubated with anti-human IgA DyLight800 antibody and the specific monoclonal  
1039 DyLight680 antibody are shown in the left panels. Epitope-like spot patterns are  
1040 indicated by white arrows. d-i) Tukey box plots showing concentrations of IgG and IgA  
1041 present in individual HUS sera (n=20) that are reactive to short peptides containing B-  
1042 cell epitopes of the OmpT, Cah and Hes proteins. A lower number of HUS sera and  
1043 Hes epitopes were assessed due to sera availability. Tukey box plots show the 25<sup>th</sup> to  
1044 75<sup>th</sup> percentiles, with the median indicated by the horizontal line inside the box. Data  
1045 analysis was by Kruskal-Wallis test, followed by Dunn's multiple comparison test. \*P <  
1046 0.05 was considered significant. j and k) Heatmaps show the logarithm of the IgG and  
1047 IgA concentration of each serum (HUS or control sera) that recognizes a specific short  
1048 peptide, respectively. Data were clustered hierarchically using Euclidean distance and  
1049 complete linkage analyses. Each row represents a different serum and each column a  
1050 specific epitope. The average (dotted line) and histogram (solid line) of the values  
1051 obtained by each peptide are indicated in the columns. The color key indicates the  
1052 value of the logarithm of the antibody concentration. The figure was made using the  
1053 "gplots" <sup>90</sup> package in R <sup>91</sup>.  
1054  
1055

1056 **Figure 3. Design and production of the chimeric antigens.** a) Predicted 3D  
1057 structure of the Chimera 1 (Chi1) antigen. OmpT- and Hes-derived peptides are shown  
1058 as indicated in the legend at the left. b and c) Quality validation of modeled Chi1  
1059 structure. Ramachandran plot (b) shows that 94.6% residues were in favored regions.  
1060 Z-score plot (c) for Chi1 model obtained by ProSA-web.<sup>81</sup> Dark blue and light blue  
1061 regions represent z-scores of native protein structures determined by NMR and X-ray,  
1062 respectively. Black spot shows z-score for the Chi1 model. d) Predicted 3D structure of  
1063 the Chimera 2 (Chi2) antigen. OmpT- and Hes-derived peptides are shown as

1064 indicated in the legend at the left. **e and f**) Quality validation of modeled Chi2 structure.  
1065 Ramachandran plot (e) shows that 86.6% residues were in favored regions. Z-score  
1066 plot (f) for Chi2 model. **g**) SDS-PAGE of purified Chi1 and Chi2 proteins. M, Molecular  
1067 weight standard. **h-i**) Tukey box plots showing concentrations of IgG (h) and IgA (i)  
1068 present in individual HUS sera (n=20) that are reactive to Chi1, Chi2 and  $\alpha$ Cah  
1069 proteins. Tukey box plots show the 25<sup>th</sup> to 75<sup>th</sup> percentiles, with the median indicated by  
1070 the horizontal line inside the box. Data analysis was by Kruskal-Wallis test, followed by  
1071 Dunn's multiple comparison test. \*P < 0.05 was considered significant.  
1072

1073 **Figure 4. Humoral immune responses triggered by immunization with the**  
1074 **chimeric antigens.** Sera obtained at days -2, 14, 28 and 42 post-immunization were  
1075 diluted 1:100 and used for the determination of specific IgG (a), IgA (b) and IgM (c) by  
1076 ELISA. Fecal sIgA (d) was also determined from feces collected on days -2, 14, 28 and  
1077 42. The ELISA plates were coated with 100  $\mu$ l of each antigen (Chi1, Chi2 and an  
1078 equimolar mix Chi1+Chi2) at a final concentration of 1  $\mu$ g/ml in carbonate-bicarbonate  
1079 buffer (pH 9.6) and incubated overnight at 4 °C. Then, the plates were blocked, washed  
1080 and incubated with different dilutions of each serum. The results are expressed as  
1081 means  $\pm$  SD of absorbance values at 450 nm ( $A_{450}$ ), which were obtained from  
1082 individual sera or fecal suspensions of five mice per group. Experimental groups are  
1083 shown as indicated by legend at the bottom. Data analysis was by a two-way ANOVA,  
1084 followed by Tukey's multiple comparison test. P < 0.05 was considered significant.  
1085 Asterisks (\*) indicate significant differences between the immunized mice and the PBS  
1086 control group. Number signs (#) indicate significant differences between administration  
1087 routes.  
1088  
1089

1090 **Figure 5. Protection conferred by immunizations with the chimeric antigens. a**  
1091 **and b)** Determination of fecal shedding of STEC O157:H7. Eight mice per group were  
1092 orally inoculated with 10<sup>9</sup> CFU of the challenge strain. Fecal pellets were collected  
1093 daily, weighed, homogenized, and plated on MacConkey agar containing streptomycin.  
1094 Data are showed as the number of CFU of the challenge strain per 100 mg feces. Error  
1095 bars represent the standard deviations (s.d.). Differences between immunized mice  
1096 and the PBS control group were analyzed by a two-way ANOVA with Tukey's multiple  
1097 comparison test. Experimental groups are shown as indicated by legend at the bottom.  
1098 **c and d)** Tukey box plots showing creatinine concentrations (mg/dl) in urine  
1099 determined from five mice per group on days 7 (c) and 12 (d) post-infection with STEC  
1100 O91:H21. Differences between experimental groups and uninfected mice were  
1101 analyzed by Mann-Whitney U test. Dotted green line indicates normal creatinine  
1102 concentration of 1.5 mg/dl. **e)** Histopathology analysis from kidney tissue obtained from  
1103 five mice per group on day 12 post-infection with STEC O91:H21. Cellular injuries were  
1104 classified as not evident, mild, moderate or severe as described in the Methods.  
1105 Cellular injuries are color coded as indicated in the legend at the top. Differences  
1106 between experimental groups and uninfected mice were analyzed by a two-way  
1107 ANOVA followed by Tukey's multiple comparison test. For all statistical analyses P <  
1108 0.05 was considered significant.

### (a) Antigens

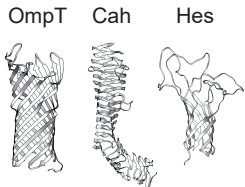

- Reactive to IgG and IgA from HUS sera
- Expressed during human infection
- Widespread among clinical STEC strains
- Mainly absent in commensal *E. coli* strains

### (b) Identification and validation of epitopes

- Epitope mapping

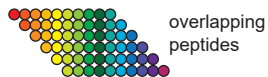

- *In silico* prediction of B and T cell epitopes

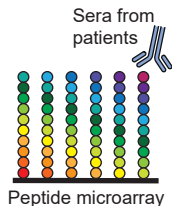

- Validation of B-cell epitopes by ELISA

### (c) Design and purification of chimeric proteins

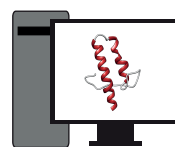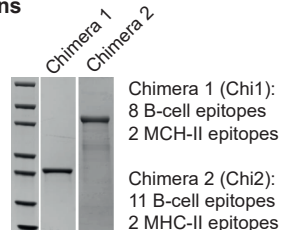

- Confirmation of seroreactivity of chimeras by ELISA

### (d) Immunization, determination of immune responses and challenge experiments

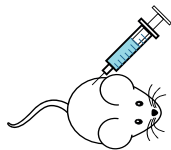

Intramuscular immunization

vs.

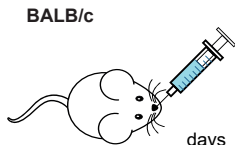

Intranasal immunization

- Group 1: Chi1 + IA  
Group 3: Chi2 + IA  
Group 5: Chi1 + Chi2 + IA  
Group 7: PBS + IA + SA

- Group 2: Chi1 + SA  
Group 4: Chi2 + SA  
Group 6: Chi1 + Chi2 + SA

days

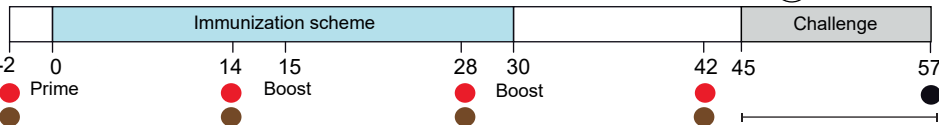

Samples collection:

- Blood
- Urine
- Feces
- Organs



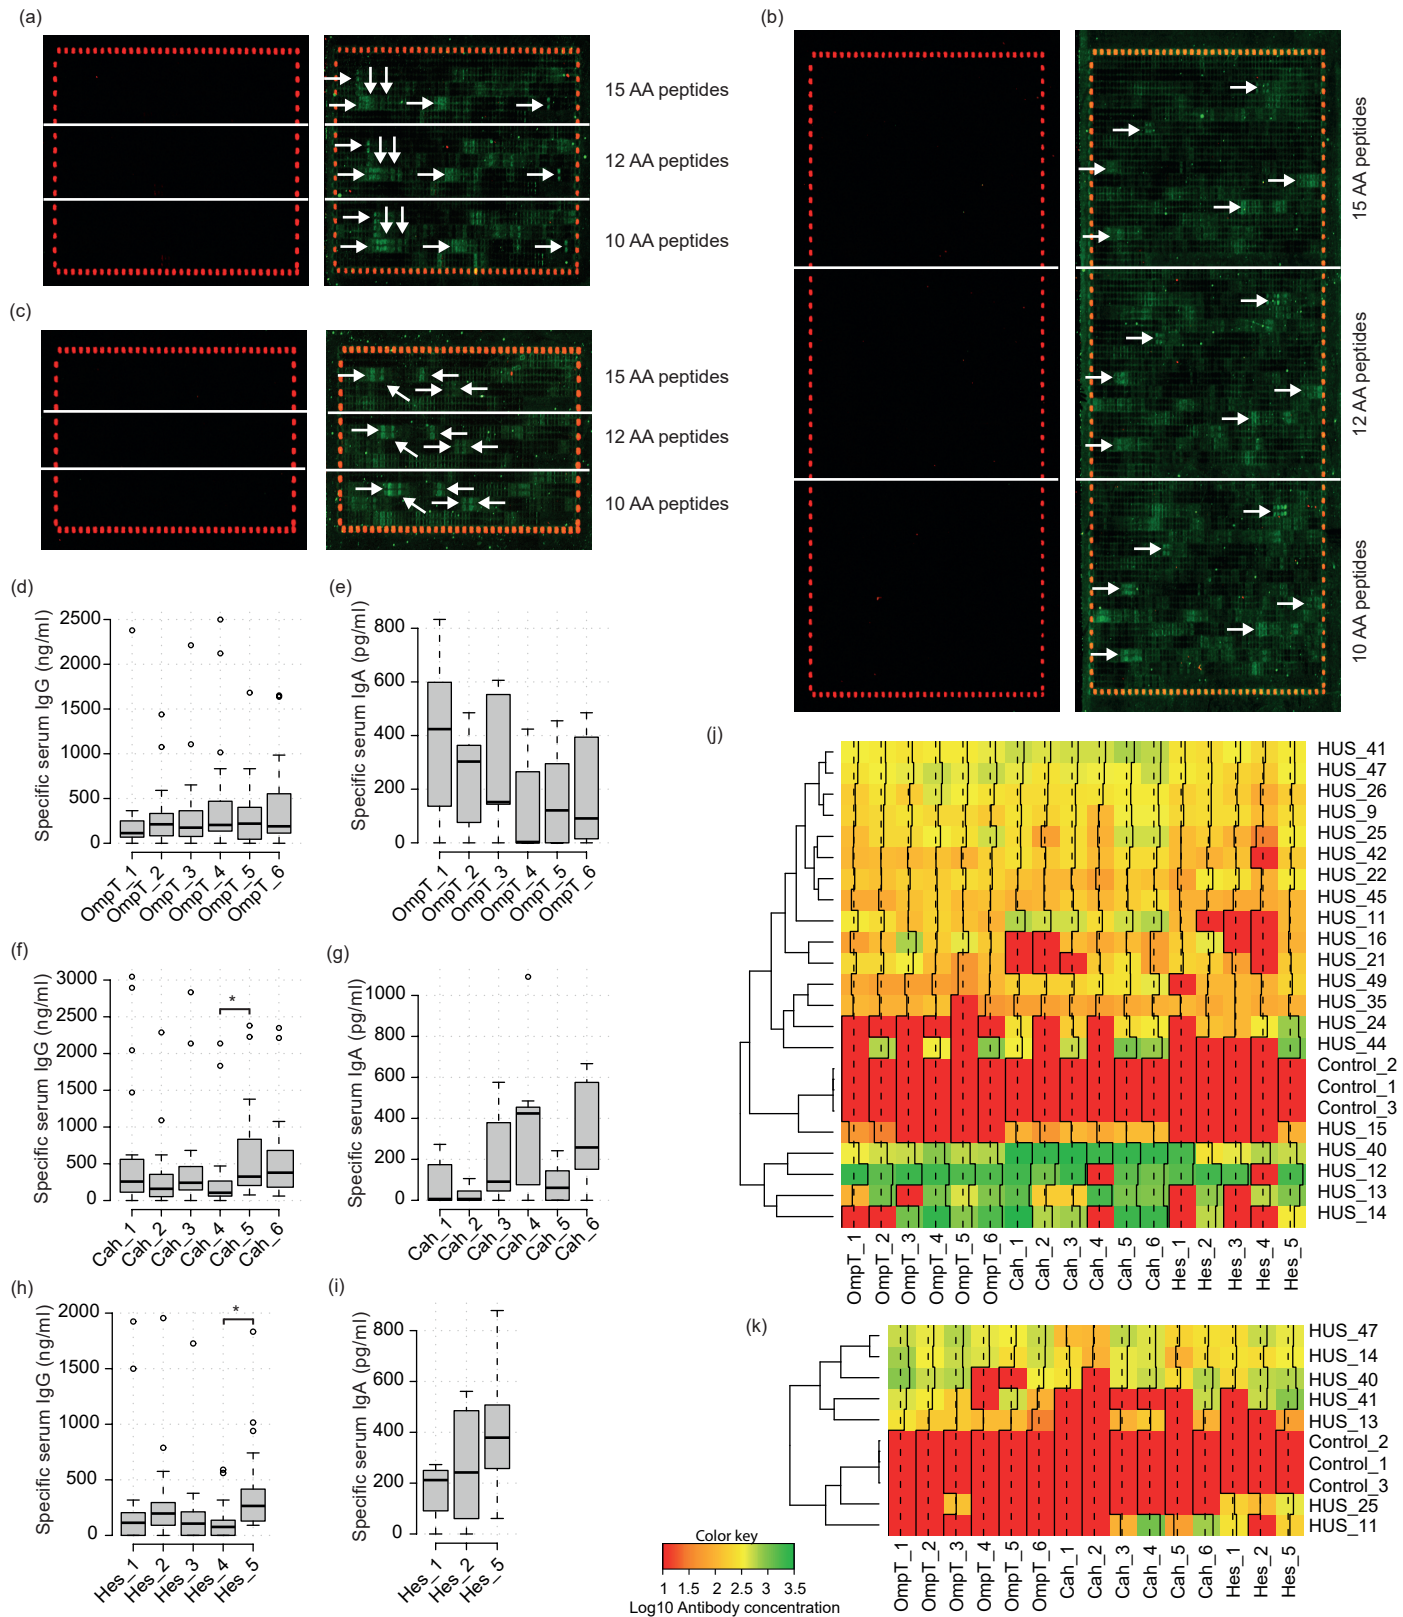

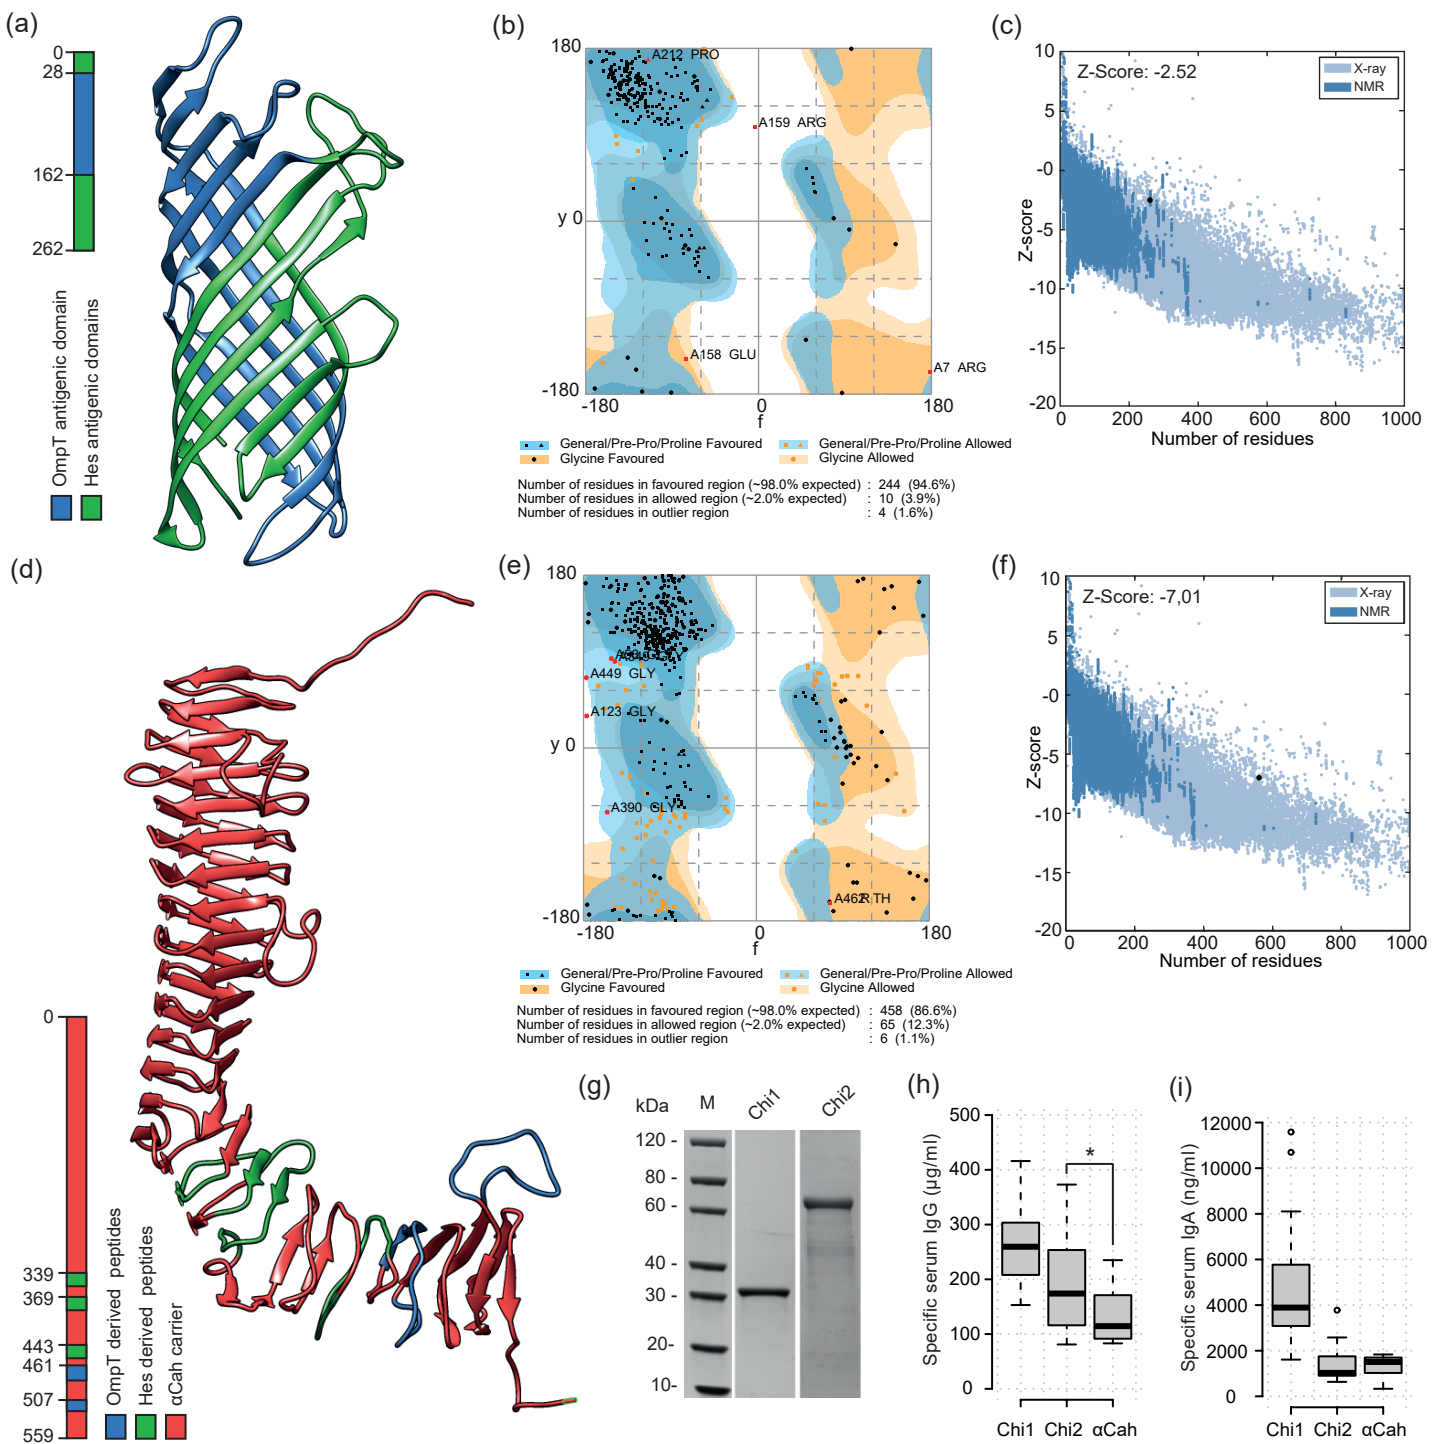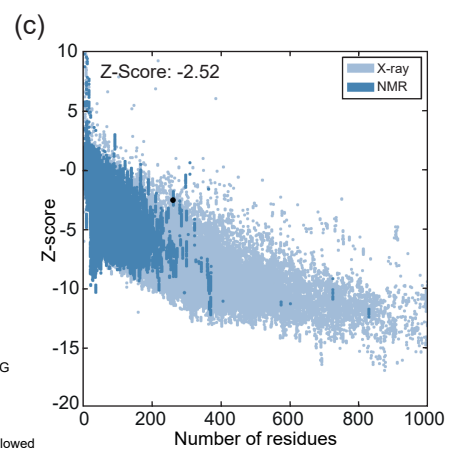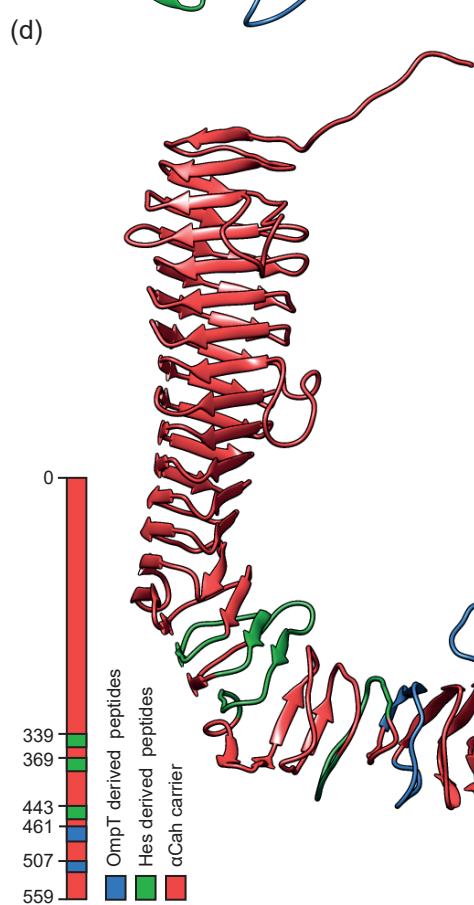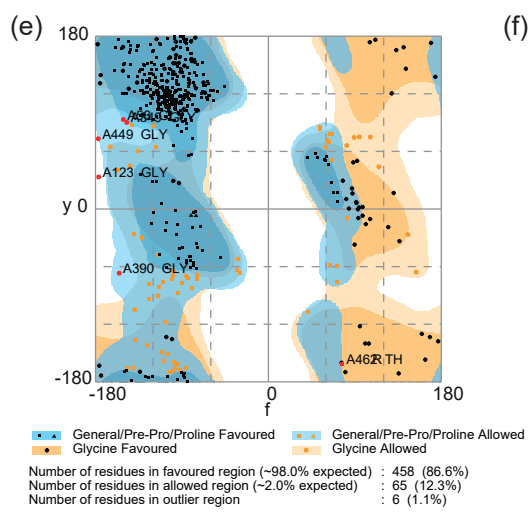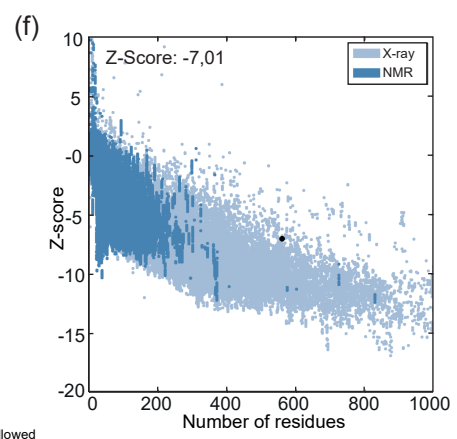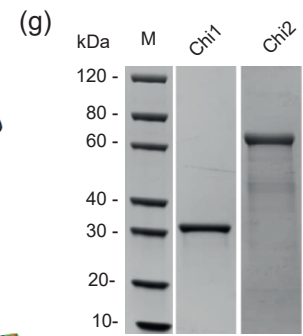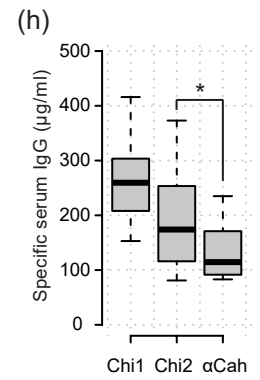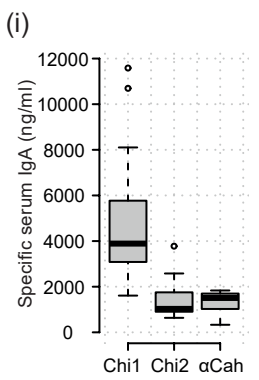

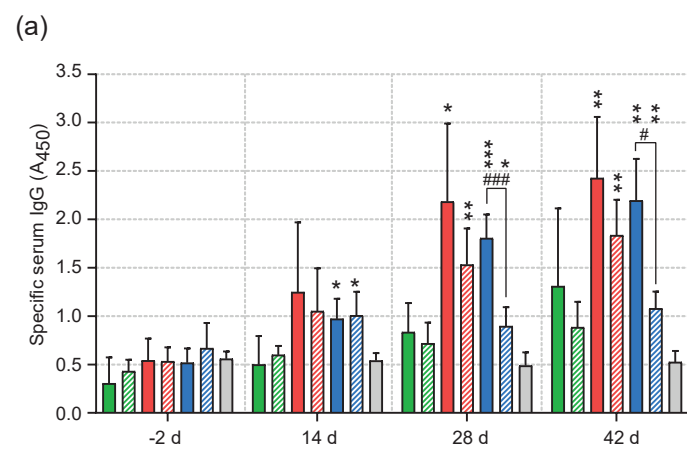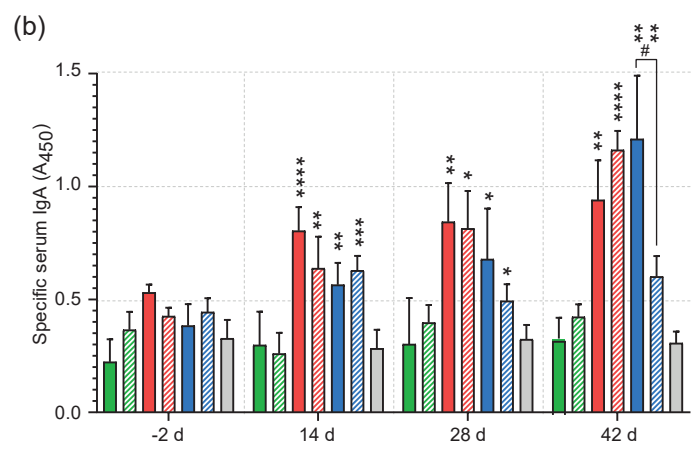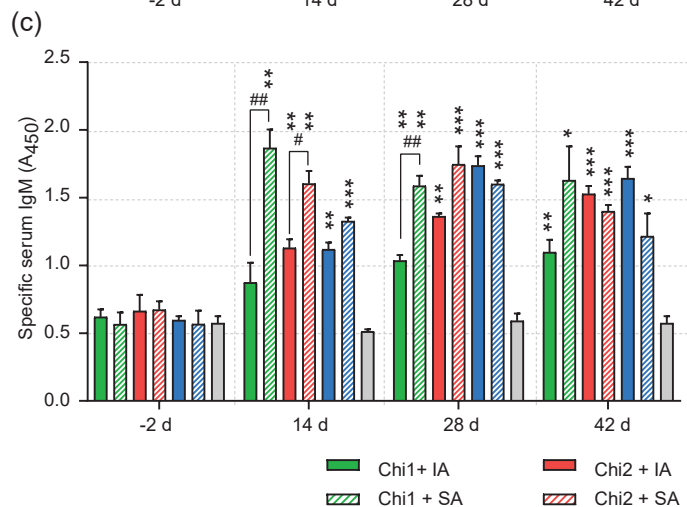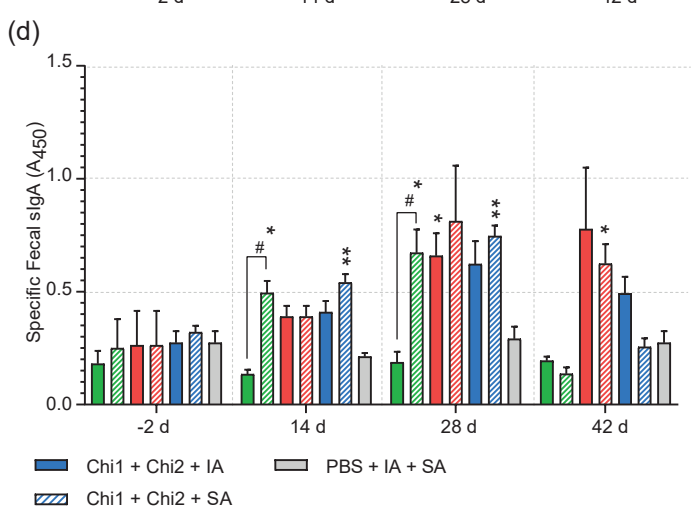

■ Chi1 + IA      ■ Chi2 + IA  
▨ Chi1 + SA      ▨ Chi2 + SA

■ Chi1 + Chi2 + IA      ■ PBS + IA + SA  
▨ Chi1 + Chi2 + SA

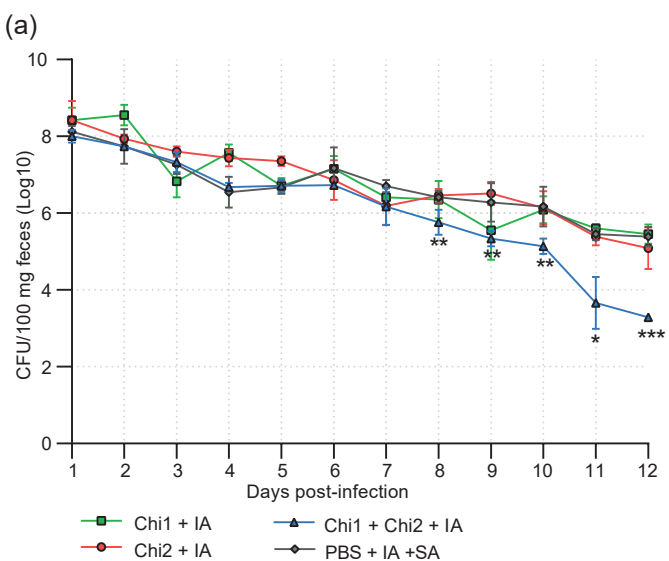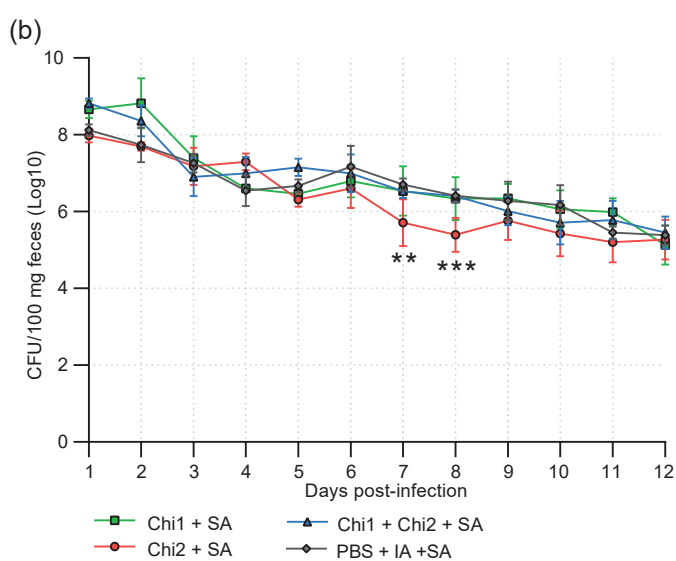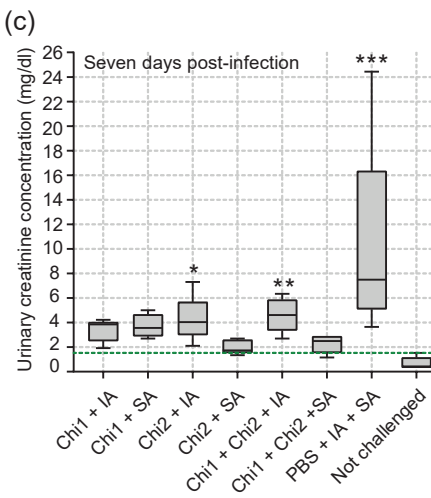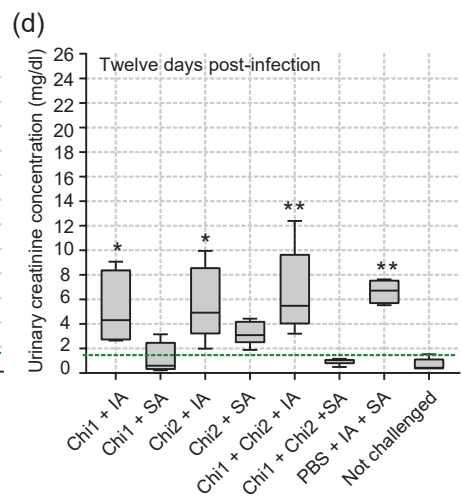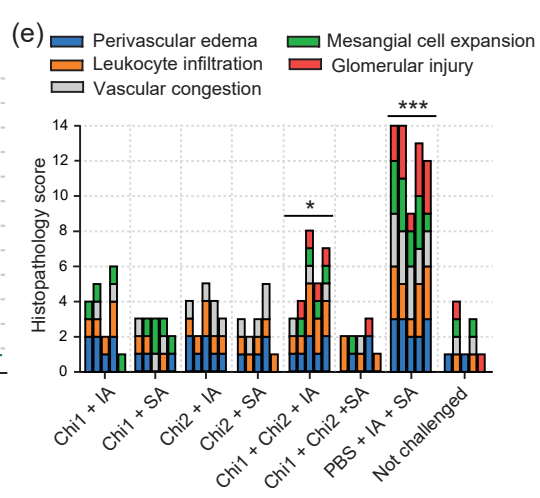

**Table 1.** Linear B-cell epitopes identified in the OmpT, Cah and Hes proteins

| Protein     | Epitope name | Epitope Mapping | <i>In silico</i> B-cell prediction tools |                         |         | Reactivity to HUS sera by ELISA. No (%) |           | Reactivity to control sera by ELISA. No (%) |         |
|-------------|--------------|-----------------|------------------------------------------|-------------------------|---------|-----------------------------------------|-----------|---------------------------------------------|---------|
|             |              |                 | BepiPred 2.0                             | Kolaskar and Tongaonker | Ellipro | IgG                                     | IgA       | IgG                                         | IgA     |
| <b>OmpT</b> | OmpT_1       | Yes             | Yes                                      | No                      | Yes     | 17/20 (85)                              | 5/7 (71)  | 0/3 (0)                                     | 0/3 (0) |
|             | OmpT_2       | Yes             | Yes                                      | No                      | Yes     | 18/20 (90)                              | 5/7 (71)  | 0/3 (0)                                     | 0/3 (0) |
|             | OmpT_3       | Yes             | Yes                                      | Yes                     | Yes     | 16/20 (80)                              | 6/7 (86)  | 0/3 (0)                                     | 0/3 (0) |
|             | OmpT_4       | Yes             | Yes                                      | Yes                     | Yes     | 18/20 (90)                              | 3/7 (43)  | 0/3 (0)                                     | 0/3 (0) |
|             | OmpT_5       | Yes             | Yes                                      | No                      | Yes     | 16/20 (80)                              | 4/7 (57)  | 0/3 (0)                                     | 0/3 (0) |
|             | OmpT_6       | Yes             | Yes                                      | No                      | Yes     | 18/20 (90)                              | 5/7 (71)  | 0/3 (0)                                     | 0/3 (0) |
| <b>Cah</b>  | Cah_1        | Yes             | Yes                                      | Yes                     | Yes     | 18/20 (90)                              | 3/7 (43)  | 0/3 (0)                                     | 0/3 (0) |
|             | Cah_2        | Yes             | No                                       | No                      | No      | 16/20 (80)                              | 2/7 (29)  | 0/3 (0)                                     | 0/3 (0) |
|             | Cah_3        | Yes             | Yes                                      | No                      | Yes     | 19/20 (95)                              | 5/7 (71)  | 0/3 (0)                                     | 0/3 (0) |
|             | Cah_4        | Yes             | No                                       | No                      | No      | 16/20 (80)                              | 5/7 (71)  | 0/3 (0)                                     | 0/3 (0) |
|             | Cah_5        | Yes             | No                                       | No                      | No      | 20/20 (100)                             | 4/7 (57)  | 0/3 (0)                                     | 0/3 (0) |
|             | Cah_6        | Yes             | No                                       | No                      | No      | 20/20 (100)                             | 6/7 (86)  | 0/3 (0)                                     | 0/3 (0) |
| <b>Hes</b>  | Hes_1        | Yes             | Yes                                      | No                      | Yes     | 14/20 (70)                              | 5/7 (71)  | 0/3 (0)                                     | 0/3 (0) |
|             | Hes_2        | Yes             | Yes                                      | Yes                     | Yes     | 17/20 (85)                              | 5/7 (71)  | 0/3 (0)                                     | 0/3 (0) |
|             | Hes_3        | Yes             | Yes                                      | No                      | Yes     | 14/20 (70)                              | N.E.      | 0/3 (0)                                     | N.E.    |
|             | Hes_4        | Yes             | No                                       | No                      | Yes     | 12/20 (60)                              | N.E.      | 0/3 (0)                                     | N.E.    |
|             | Hes_5        | Yes             | Yes                                      | No                      | Yes     | 20/20 (100)                             | 7/7 (100) | 0/3 (0)                                     | 0/3 (0) |

N.E. Not evaluated

**Table 2.** Epitopes and chemical and physical properties of the chimeric proteins

| Protein   | B-cell epitopes                                                                  | Predicted T-cell epitopes | MW (kDa) | Theoretical pI | Solubility <sup>1</sup> | Estimated half-life <sup>2</sup> | Instability index <sup>3</sup> |
|-----------|----------------------------------------------------------------------------------|---------------------------|----------|----------------|-------------------------|----------------------------------|--------------------------------|
| Chimera 1 | OmpT_1, OmpT_2, OmpT_3, OmpT_4, Hes_1, Hes_2, Hes_3 and Hes_5                    | Two of OmpT               | 29.6     | 4.51           | 0.693                   | >10 hours                        | 21.30                          |
| Chimera 2 | OmpT_1, OmpT_6, Cah_1, Cah_2, Cah_3, Cah_4, Cah_5, Cah_6, Hes_1, Hes_2 and Hes_5 | Two of Cah                | 56.7     | 4.52           | 0.666                   | >10 hours                        | 8.02                           |

<sup>1</sup> Predicted by Protein-Sol tool <sup>69</sup>. Scaled solubility value (0-1). A value greater than 0.45 predicts that the protein is soluble.

<sup>2</sup> Prediction of the time it takes for half of the amount of protein in *E. coli* to disappear after its synthesis. <sup>3</sup> The instability index provides an estimate of the stability of a protein in a test tube. A protein whose instability index is smaller than 40 is predicted as stable <sup>77</sup>.

**Table 3.** Intestinal colonization of STEC O157:H7 and protection conferred by immunization with chimeric proteins

| Chimeric protein + Adjuvant        | Log <sub>10</sub> CFU of STEC O157:H7 in Cecum (mean ± SD) | Log <sub>10</sub> units of protection |
|------------------------------------|------------------------------------------------------------|---------------------------------------|
| Chi1 + Imject Alum                 | 5.45 ± 0.24                                                | 0                                     |
| Chi1 + Sigma Adjuvant              | 4.70 ± 0.56                                                | 0.68                                  |
| Chi2 + Imject Alum                 | 5.08 ± 0.54                                                | 0.30                                  |
| Chi2 + Sigma Adjuvant              | 4.70 ± 0.86                                                | 0.68                                  |
| Chi1 + Chi2 + Imject Alum          | 3.28 ± 0.10                                                | 2.10 *                                |
| Chi1 + Chi2 + Imject Alum          | 4.94 ± 0.81                                                | 0.44                                  |
| PBS + Imject Alum + Sigma Adjuvant | 5.38 ± 0.24                                                | 0                                     |

\* P < 0.001 as compared to the PBS control group.
